1 Short title: Sugarcane drought tolerance: from mothers to daughters

2

3 **Stressed mothers, tolerant daughters: a case study**

4 **about the physiological responses and growth of**

5 **sugarcane plants under water deficit**

6

7 Fernanda C. C. Marcos<sup>1</sup>, Neidiquele M. Silveira<sup>2</sup>, Paulo E. R. Marchiori<sup>3</sup>, Eduardo C.

8 Machado<sup>2</sup>, Gustavo M. Souza<sup>4</sup>, Marcos G. A. Landell<sup>5</sup> and Rafael V. Ribeiro<sup>1\*</sup>

9

10 <sup>1</sup>Laboratory of Crop Physiology, Department of Plant Biology, Institute of Biology,

11 University of Campinas (UNICAMP), Campinas SP, Brazil

12 <sup>2</sup>Laboratory of Plant Physiology 'Coaracy M. Franco', Centre for Research and

13 Development in Ecophysiology and Biophysics, Agronomic Institute (IAC), Campinas SP,

14 Brazil

15 <sup>3</sup>Department of Biology, Federal University of Lavras (UFLA), Lavras MG, Brazil.

16 <sup>4</sup>Department of Botany, Institute of Biology, Federal University of Pelotas (UFPeL),

17 Pelotas RS, Brazil.

18 <sup>5</sup>Sugarcane Research Center, IAC, Ribeirão Preto SP, Brazil.

19

20 \*Corresponding author

21 Rafael V. Ribeiro [rvr@unicamp.br](mailto:rvr@unicamp.br)

22

## 23 **Abstract**

24 Drought stress can imprint marks in plants after a previous exposure, leading to a  
25 permissive state that facilitates a more effective response to subsequent stress events.  
26 Such stress imprints would benefit plants obtained from progenitors previously exposed  
27 to drought. Herein, our hypothesis was that daughter plants obtained from mother  
28 plants previously exposed to water deficit will perform better under water deficit as  
29 compared to those obtained from mothers that did not face stressful conditions.  
30 Sugarcane mother plants were grown under well-hydrated conditions or subjected to  
31 three cycles of water deficit by water withholding. Then, daughter plants produced  
32 through vegetative propagation were subjected to water deficit. Leaf gas exchange was  
33 reduced under water deficit and daughters from mothers that experienced water deficit  
34 presented a faster recovery of CO<sub>2</sub> assimilation and higher instantaneous carboxylation  
35 efficiency after rehydration as compared to daughters from mothers that did not face  
36 water deficit. Plants obtained from mother plants that faced water deficit showed the  
37 highest leaf proline concentration under water deficit as well as higher leaf H<sub>2</sub>O<sub>2</sub>  
38 concentration and leaf ascorbate peroxidase activity regardless of water regime. Under  
39 well-watered conditions, daughters from mothers that faced stressful conditions  
40 presented higher root H<sub>2</sub>O<sub>2</sub> concentration and root catalase activity than ones from  
41 mothers that did not experience water shortage. Such physiological changes were  
42 associated with improvements in leaf area and shoot and root dry matter accumulation  
43 in daughters from stressed mothers. Our results suggest that root H<sub>2</sub>O<sub>2</sub> concentration is  
44 a chemical signal associated with stress memory and improved sugarcane growth. Such

45 findings bring a new perspective to sugarcane production systems, in which stress  
46 memory can be explored for improving drought tolerance in rainfed areas.

47

48 **Key words:** drought, memory, photosynthesis, propagation, resistance.

49

## 50 **Introduction**

51 As a semi-perennial species, sugarcane plants face seasonal drought under field  
52 conditions, where water deficit causes reduction in photosynthesis and accumulation of  
53 carbohydrates, changes in antioxidant metabolism, and finally impairment of plant  
54 growth and sucrose yield [1, 2]. However, recurrent cycles of drought followed by  
55 rehydration are known to improve plant performance during a new stressful event [3-  
56 5]. Such phenomenon indicates that plants are able to change their metabolism and  
57 growth after an external stimulus, improving recovery of photosynthesis, increasing  
58 intrinsic water use efficiency [4] and photoprotection [6] and reducing the negative  
59 impact of drought on yield [7].

60 Improved plant response induced by previous exposure to a limiting factor is an  
61 evidence of stress memory, a way to storage information of stressful events [3, 8, 9]. In  
62 fact, such stress memory can assist plants in future stresses [9] and one important issue  
63 is the site (plant tissue) in which information is stored within plants. Plants do not have  
64 a specific region to store information and they can sense the environment with all their  
65 body and the intricate cell signaling system. Then, plants can perceive one stimulus in  
66 one site and the respective response be found in a different organ due to signaling [10].

67 One important requirement for retaining information is that stress-induced signals are  
68 still present when the stressor is no longer affecting plants [11].

69 In nature, plant phenotype is also defined by transgenerational regulation, which  
70 occurs when internal changes persist in the next generation through epigenetic marks  
71 such as DNA methylation [8]. There is reasonable evidence for assuming that plants can  
72 sense changes in the environment during growth and modify the phenotype of their  
73 progeny to be more adapted to growing conditions [8, 12]. The stress-induced memory  
74 can be transferred to subsequent generations by seeds and through vegetative  
75 propagation [13]. In the first case, plants can pass epigenetic information through the  
76 meiosis process and produce seeds with stress memory [12, 14]. For instance, Boyko et  
77 al. [14] showed that *Arabidopsis thaliana* exposed to cold, heat and flooding had  
78 increased global genome methylation and higher tolerance to stress as compared to  
79 progeny from plants that never faced stressful conditions. However, stress-induced  
80 signals may be erased or diminished during meiosis, reducing stress memory. On the  
81 other hand, clonal plants produced by vegetative propagation have apparently better  
82 ability to recover signals acquired during stress events than non-clonal plants [15].

83 Considering stress memory, plant propagation and drought-induced effects on  
84 plants, we hypothesized that plants obtained from others previously exposed to drought  
85 will perform better under water deficit as compared to plants obtained from mother  
86 plants that never faced water shortage. Through vegetative propagation, information  
87 about previous stresses (memory) can be stored in sugarcane buds, which will sprout  
88 and produce new plants. Sugarcane is an important crop for ethanol and bioenergy  
89 production – a clean alternative for energy production – and its expansion to rainfed

90 areas needs more drought tolerant plants. Then, stress memory would be an interesting  
91 tool for improving crop establishment and initial growth in such new areas.

92

## 93 **Materials and methods**

94

### 95 **Plant material and growth conditions**

96 Sugarcane (*Saccharum* spp.) plants cv. IACSP94-2094 were obtained from mini-  
97 stalks containing one bud and grown in plastic pots (0.5 L), with commercial substrate  
98 composed of sphagnum peat, expanded vermiculite, limestone dolomite, agricultural  
99 gypsum and NPK fertilizer (Carolina Soil<sup>®</sup>, Vera Cruz RS, Brazil). Thirty-four days after  
100 planting, plants were transferred to larger pots (20 L) containing typical red-yellow  
101 Latosol [16], fertilized with urea (equivalent to 300 kg N ha<sup>-1</sup>), superphosphate  
102 (equivalent to 300 kg P<sub>2</sub>O<sub>5</sub> ha<sup>-1</sup>) and potassium chloride (equivalent to 260 kg K<sub>2</sub>O ha<sup>-1</sup>)  
103 according to Dias and Rossetto [17]. During the experiment, other three fertilizations  
104 were performed at 30, 60 and 150 days after planting, with the same amount of urea,  
105 superphosphate and potassium chloride as the first fertilization. The plants were grown  
106 under greenhouse conditions, where the average air temperature was 24.4±6.6 °C,  
107 relative humidity was 76±17% and the maximum photosynthetic photon flux density  
108 (PPFD) was approximately 1,200 μmol m<sup>-2</sup> s<sup>-1</sup>. Plants were irrigated daily and grown  
109 under well-hydrated conditions until they were six-month old.

110

## 111 **Inducing water deficit to mother plants**

112           When plants were 6-month old, one group of plants was maintained under daily  
113 irrigation (W) and another group was subjected to three cycles of water deficit (D) by  
114 water withholding. Each cycle of water deficit lasted nine days and soil moisture was  
115 monitored with soil moisture-sensors model Water Scout SM100 (Yara ZimTechnology,  
116 Berlin, Germany). While soil volumetric water content (VWC) reached 20% during cycles  
117 of water deficit, it was higher than 60% in well-watered pots. After nine days of water  
118 deficit, plants were irrigated and maintained under well-watered conditions for six days  
119 before the new cycle of water deficit, with leaf gas exchange being measured daily. After  
120 three cycles of water deficit, we evaluated the number of tillers, number of green and  
121 senescent leaves, total leaf area and dry matter of leaves, stems and roots. Then,  
122 daughter plants were produced through vegetative propagation from those mother  
123 plants that experienced or not cycles of water deficit, as cited in the previous section.

124

## 125 **Inducing water deficit to daughter plants**

126           After sprouting in commercial substrate (Carolina Soil®, Vera Cruz RS, Brazil),  
127 one-month old plants were placed in plastic boxes (12 L) with nutrient solution and  
128 transferred to a growth chamber (PGR15, Conviron, Winnipeg MB, Canada) under air  
129 temperature of 30/20 °C (day/night), with 12 h photoperiod, air relative humidity of 80%  
130 and PPFD of 800  $\mu\text{mol m}^{-2} \text{s}^{-1}$ . Only the root system was immersed in modified Sarruge  
131 [18] nutrient solution (15 mmol L<sup>-1</sup> N [7% as NH<sub>4</sub><sup>+</sup>]; 4.8 mmol L<sup>-1</sup> K; 5.0 mmol L<sup>-1</sup> Ca; 2.0  
132 mmol L<sup>-1</sup> Mg; 1.0 mmol L<sup>-1</sup> P; 1.2 mmol L<sup>-1</sup> S; 28.0  $\mu\text{mol L}^{-1}$  B; 54.0  $\mu\text{mol L}^{-1}$  Fe; 5.5  $\mu\text{mol}$   
133 L<sup>-1</sup> Mn; 2.1  $\mu\text{mol L}^{-1}$  Zn; 1.1  $\mu\text{mol L}^{-1}$  Cu and 0.01  $\mu\text{mol L}^{-1}$  Mo). Nutrient solution was

134 renewed in week intervals and pH was maintained at  $5.8\pm 0.2$  and electrical conductivity  
135 at  $1.72\pm 0.18$  mS  $\text{cm}^{-1}$ . The osmotic potential of nutrient solution was  $-0.12$  MPa. Two  
136 boxes containing plants obtained from irrigated mother plants and two boxes containing  
137 plants from those mothers subjected to three cycles of water deficit were prepared.

138         Forty-eight days after transferring plants to the hydroponic system, one group of  
139 plants was subjected to water deficit by adding PEG-8000 (Carbowax<sup>TM</sup> PEG-8000, Dow  
140 Chemical Comp, Midland MI, USA) to the nutrient solution for nine days. We added PEG-  
141 8000 gradually to prevent osmotic shock. Then, the osmotic potential of nutrient  
142 solution was reduced to  $-0.27$ ,  $-0.57$  and  $-0.77$  MPa in three consecutive days. After nine  
143 days, the plants were recovered by supplying them with a nutrient solution with osmotic  
144 potential of  $-0.12$  MPa (control condition) for five days. At the end, four treatments were  
145 defined taking into account the plant origin and also the water regime plants were  
146 facing: plants obtained from mother plants grown under well-watered conditions and  
147 then maintained under well-watered conditions (W/W); plants obtained from mother  
148 plants grown under well-watered conditions and then subjected to water (W/D); plants  
149 obtained from mother plants that experienced water deficit and then maintained under  
150 well-watered conditions (D/W); plants obtained from mother plants that faced water  
151 deficit and then subjected to water (D/D).

152

## 153 **Leaf gas exchange and photochemistry**

154         Leaf gas exchange was measured daily with an infrared gas analyzer (LI-6400,  
155 LICOR, Lincoln NE, USA) attached to a modulated fluorometer (6400-40 LCF, LICOR,  
156 Lincoln NE, USA). The measurements were performed between 10:00 and 13:00 h under  
157 PPFD of  $2,000$   $\mu\text{mol m}^{-2} \text{s}^{-1}$  and air  $\text{CO}_2$  concentration of  $380$   $\mu\text{mol mol}^{-1}$ .  $\text{CO}_2$

158 assimilation ( $A$ ), stomatal conductance ( $g_s$ ), intercellular  $\text{CO}_2$  concentration ( $C_i$ ),  
159 transpiration ( $E$ ), intrinsic water use efficiency ( $A/g_s$ ), and the instantaneous  
160 carboxylation efficiency ( $k=A/C_i$ ) were evaluated in fully expanded leaves.  $A$  and  $E$  values  
161 were integrated throughout the experimental period to estimate the total  $\text{CO}_2$  gain ( $A_i$ ),  
162 the total  $\text{H}_2\text{O}$  loss through transpiration ( $E_i$ ), and the integrated water use efficiency  
163 ( $\text{WUE}=A_i/E_i$ ). The integrated values were estimated assuming that the values measured  
164 between 10:00 and 13:00 h were constant during the 12 hours of photoperiod.  
165 Chlorophyll fluorescence was measured simultaneously to leaf gas exchange and the  
166 apparent electron transport rate (ETR) was estimated as  $\text{ETR}=\phi_{\text{PSII}} \times \text{PPFD} \times 0.85 \times 0.4$ , in  
167 which  $\phi_{\text{PSII}}$  is the effective quantum efficiency of photosystem II (PSII), 0.85 is the light  
168 absorption and 0.4 is the fraction of light energy partitioned to PSII [19, 20]. Additionally,  
169 the non-photochemical quenching of fluorescence (NPQ) was evaluated and  $\text{ETR}/A$   
170 calculated. In leaf tissues adapted to darkness (30 min), the potential quantum efficiency  
171 of photosystem II ( $F_V/F_M$ ) was estimated [20].

172

## 173 **Leaf water potential and relative water content**

174 Leaf water potential ( $\psi$ ) was evaluated at the predawn with a pressure chamber  
175 (model 3005, Soilmoisture Equipment Corp., Santa Barbara CA, USA). The leaf relative  
176 water content RWC) was calculated using the fresh (FW), turgid (TW) and dry (DW)  
177 weights of leaf discs according to Weatherley [21]:  $\text{RWC} = 100 \times$   
178  $(\text{FW} - \text{DW})/(\text{TW} - \text{DW})$ . Both variables were measured in daughter plants at the  
179 maximum stress condition (9<sup>th</sup> day of water deficit) and recovery period.

180



## 181 **Carbohydrates and proline**

182           The extraction of total soluble carbohydrates (SS) was done with  
183 methanol:chloroform:water solution [22] and quantified by the phenol–sulfuric acid  
184 method [23]. Sucrose content was quantified following van Handel [24] and starch (Sta)  
185 was determined by the enzymatic method proposed by Amaral et al. [25]. The  
186 concentration of nonstructural carbohydrates (NSC) in leaves and roots was calculated  
187 as  $NSC=SS+Sta$ . Total NSC was calculated considering the dry matter of each plant (mg  
188  $plant^{-1}$ ). Plant nonstructural carbohydrates were calculated by the sum of leaf and root  
189 carbohydrates and carbohydrate partitioning among sugar types was also evaluated in  
190 both organs.

191           Leaf proline content was determined in test tubes by the reaction with the  
192 ninhydrin reagent (ninhydrin, acetic acid and orthophosphoric acid), glycine and acetic  
193 acid for 35 minutes at 100°C. The reaction mixture was extracted with toluene and the  
194 proline concentration was determined from a standard curve [26].

195

## 196 **Hydrogen peroxide and antioxidant enzymes**

197           Evaluation of hydrogen peroxide ( $H_2O_2$ ) was performed in 0.16 g fresh tissue  
198 (leaves and roots) ground in liquid nitrogen with the addition of  
199 polyvinylpolypyrrolidone (PVPP) and 0.1% of trichloroacetic acid (TCA) solution (w/v)  
200 [27]. The extract was centrifuged at 12,000  $g$ , 4°C for 15 min. The crude extract was  
201 added to the reaction medium (1.2 mL of KI 1 mol  $L^{-1}$ , potassium phosphate buffer pH  
202 7.5 and 0.1 mol  $L^{-1}$ ) in microtubes and incubated on ice under dark for 1 h. After this

203 period, the absorbance was evaluated at 390 nm. The calibration curve was done with  
204 H<sub>2</sub>O<sub>2</sub> and results were expressed as  $\mu\text{mol g}^{-1} \text{FW}$ .

205 Enzymes were extracted from 0.2 g of fresh tissues of leaves and roots grounded  
206 in liquid nitrogen, with 1% of PVPP and 2 mL of extraction medium composed by 0.1 mol  
207 L<sup>-1</sup> potassium phosphate buffer (pH 6.8), 0.1 mmol L<sup>-1</sup> ethylenediaminetetraacetic  
208 (EDTA) and 1 mmol L<sup>-1</sup> phenylmethylsulfonyl fluoride (PMSF). This homogenate was  
209 centrifuged at 15,000 *g* for 15 min and 4°C and the supernatant was collected and  
210 preserved on ice.

211 Superoxide dismutase (SOD, EC 1.15.1.1) activity was evaluated in a reaction  
212 medium with 3 mL of 100 mmol L<sup>-1</sup> sodium phosphate buffer (pH 7.8), 50 mmol L<sup>-1</sup>  
213 methionine, 5 mmol L<sup>-1</sup> EDTA, deionized water, crude extract, 100  $\mu\text{mol L}^{-1}$  riboflavin  
214 and 1 mmol L<sup>-1</sup> nitro blue tetrazolium chloride (NBT). A group of tubes was exposed to  
215 light (fluorescent lamp of 30 W) for 15 min, and another group remained in darkness.  
216 The absorbance was measured at 560 nm and one unit of SOD is the amount of enzyme  
217 required to inhibit the NBT photoreduction in 50% [28]. SOD was expressed as U g<sup>-1</sup> FW  
218 min<sup>-1</sup>.

219 Catalase (CAT, EC 1.11.1.6) activity was assayed in a reaction medium of 3 mL of  
220 100 mmol L<sup>-1</sup> potassium phosphate buffer (pH 6.8), deionized water, 125 mmol L<sup>-1</sup> H<sub>2</sub>O<sub>2</sub>  
221 and crude extract. The decrease in absorbance at 240 nm was measured and CAT activity  
222 was estimated using a molar extinction coefficient of 36 M<sup>-1</sup> cm<sup>-1</sup> and expressed as nmol  
223 g<sup>-1</sup> FW min<sup>-1</sup> [29].

224 For ascorbate peroxidase (APX, EC 1.11.1.11) activity, the reaction medium was  
225 composed by 3 mL of 100 mmol L<sup>-1</sup> potassium phosphate buffer (pH 6.0), deionized  
226 water, 10 mmol L<sup>-1</sup> ascorbic acid, 10 mmol L<sup>-1</sup> H<sub>2</sub>O<sub>2</sub> and crude extract. The decrease in

227 absorbance at 290 nm was measure and we used a molar extinction coefficient of 2.8  
228  $M^{-1} cm^{-1}$  to estimate APX in  $nmol g^{-1} FW min^{-1}$  [30].

229

## 230 **Biometry**

231 The total leaf area was measured using the LI-3000 leaf area meter (LICOR,  
232 Lincoln NE, USA), and shoot and root dry matter were evaluated after drying samples in  
233 a forced air oven at 65 °C. Measurements were taken at the end of the experimental  
234 period.

235

## 236 **Statistical analysis**

237 The experimental design was in randomized blocks and the causes of variation  
238 were water conditions (two levels) and material origin (two levels). The data were  
239 subjected to ANOVA procedure and the mean values (n=4) were compared by the Tukey  
240 test at 5% probability level.

241

## 242 **Results**

243

### 244 **Mother plants under water deficit**

245 Herein, mother plants are defined as those ones that provided vegetative  
246 material for propagation, i.e., small stalk segments with buds. Mother plants were  
247 subjected to three cycles of water deficit and leaf gas exchange was measured during  
248 dehydration and rehydration stages (S1 Fig). There was a significant reduction in leaf

249 CO<sub>2</sub> assimilation after four days of water withholding in all cycles of water deficit (S1  
250 Fig), with net photosynthesis reaching null values or even negative ones (respiration).  
251 Full recovery of leaf CO<sub>2</sub> assimilation was noticed in all cycles and the negative impact  
252 of water deficit was reduced from the first to the third cycle (S1 Fig). After three cycles  
253 of water deficit, there was a significant reduction of biomass production (S2 Fig), with  
254 reductions in the number, dry matter and area of green leaves as well as decreases in  
255 root and stem dry matter (S1 Table).

256 Then, small stalk segments (around 3 cm) with one bud were obtained from  
257 those mother plants and planted in individual recipients to produce new plants, i.e.,  
258 daughter plants. Buds from mother plants subjected to water deficit had higher  
259 sprouting (*ca.* 95%) than buds from mother plants maintained under well-watered  
260 conditions (*ca.* 74%). Thirty days after planting, daughter plants were placed in plastic  
261 boxes with nutrient solution and four treatments were done after 18 days: plants from  
262 mother plants grown under well-watered conditions maintained under well-watered  
263 conditions (W/W) or subjected to water deficit (W/D); and plants from mother plants  
264 grown under cycles of water deficit maintained under well-watered conditions (D/W) or  
265 subjected to water deficit (D/D).

266

## 267 **Daughter plants under water deficit**

268 Water deficit reduced leaf CO<sub>2</sub> assimilation, stomatal conductance and the  
269 instantaneous carboxylation efficiency, regardless of the plant origin (Fig 1).  
270 Interestingly, plants originated from mother plants that experienced water deficit (D/D)  
271 presented a faster recovery of leaf CO<sub>2</sub> assimilation and carboxylation efficiency as  
272 compared to W/D plants (Fig 1A,C). Integrated leaf CO<sub>2</sub> assimilation and transpiration

273 were reduced by water deficit in a similar way when comparing W/D and D/D treatments  
274 (Fig 2A,B). However, recovery of photosynthesis was favored in D/D plants and then  
275 integrated water use efficiency was improved under water deficit (Fig 2C).

276

277 **Fig 1. Time course of leaf gas exchange in daughter plants under water deficit.**

278 Leaf CO<sub>2</sub> assimilation (A), stomatal conductance (B), and instantaneous carboxylation  
279 efficiency (C) in sugarcane plants grown under well-watered conditions (W/W and D/W)  
280 or subjected to water deficit (W/D and D/D). Daughter plants were obtained from  
281 mother plants previously exposed to water deficit (D/W and D/D) or grown under well-  
282 watered conditions (W/W and W/D). The gray area indicates the water deficit period.  
283 Each symbol is the mean values  $\pm$  s.d. (n=4).

284

285 **Fig 2. Integrated leaf gas exchange in daughter plants during and after water deficit.**

286 Integrated CO<sub>2</sub> assimilation (A), transpiration (B) and water use efficiency (C) in  
287 sugarcane plants grown under well-watered conditions (W/W and D/W) or subjected to  
288 water deficit (W/D and D/D). Daughter plants were obtained from mother plants  
289 previously exposed to water deficit (D/W and D/D) or grown under well-watered  
290 conditions (W/W and W/D). Integration was done during the water deficit (stress) and  
291 recovery (gray area) periods, as shown in Fig 1. Each histogram is the mean values + s.d.  
292 (n=4). Different letters mean statistical differences among treatments ( $p < 0.05$ ).

293

294 After nine days of water deficit, pre-dawn leaf water potential was reduced and  
295 D/D plants showed the lowest values (Fig 3A). Regarding the leaf relative water content,  
296 there was a similar response to water deficit and both W/D and D/D plants exhibited the

297 lowest values (Fig 3B). While the pre-dawn leaf water potential was fully recovered, leaf  
298 relative water content was partially recovered after four days of plant rehydration (Fig  
299 3).

300

301 **Fig 3. Water relations in daughter plants under water deficit.**

302 Predawn leaf water potential (A) and relative water content (B) in sugarcane plants  
303 grown under well-watered conditions (W/W and D/W) or subjected to water deficit  
304 (W/D and D/D). Daughter plants were obtained from mother plants previously exposed  
305 to water deficit (D/W and D/D) or grown under well-watered conditions (W/W and  
306 W/D). Measurements were done during the water deficit (stress) and recovery (gray  
307 area) periods, as shown in Fig 1. Each histogram is the mean values + s.d. (n=4). Different  
308 letters mean statistical differences among treatments ( $p < 0.05$ ).

309

310 Water deficit caused decreases in the potential quantum efficiency of PSII ( $F_v/F_m$ )  
311 and also in the apparent electron transport rate (ETR) of W/D and D/D plants (Fig 4A,B).  
312 Although D/D plants had shown the lowest ETR values, the ratio ETR/A was similar  
313 between W/D and D/D plants, increasing in more than three times due to water deficit  
314 (Fig 4C). Non-photochemical quenching was increased by water deficit only in W/D  
315 plants (Fig 4D). All photochemical indices were recovered after plant rehydration, with  
316 W/W vs. W/D and D/W vs. D/D plants showing similar values.

317

318 **Fig 4. Photochemistry of daughter plants during and after water deficit**

319 Potential quantum efficiency of photosystem II (A), the apparent electron transport rate  
320 estimated (B), ETR/A ratio (C), and the non-photochemical quenching of fluorescence

321 (D) in sugarcane plants grown under well-watered conditions (W/W and D/W) or  
322 subjected to water deficit (W/D and D/D). Daughter plants were obtained from mother  
323 plants previously exposed to water deficit (D/W and D/D) or grown under well-watered  
324 conditions (W/W and W/D). Measurements were done during the water deficit (stress)  
325 and recovery (gray area) periods, as shown in Fig 1. Each histogram is the mean values  
326 + s.d. (n=4). Different letters mean statistical differences among treatments (p<0.05).

327

328 Leaf proline content was increased under water deficit and D/D plants presented  
329 the highest values. After the recovery period, W/D plants presented higher proline  
330 content than D/D plants (Fig 5).

331

332 **Fig 5. Leaf proline concentration in daughter plants under water deficit.**

333 Leaf proline concentration in sugarcane plants grown under well-watered conditions  
334 (W/W and D/W) or subjected to water deficit (W/D and D/D). Daughter plants were  
335 obtained from mother plants previously exposed to water deficit (D/W and D/D) or  
336 grown under well-watered conditions (W/W and W/D). Measurements were done  
337 during the water deficit (stress) and recovery (gray area) periods, as shown in Fig 1. Each  
338 histogram is the mean values + s.d. (n=4). Different letters mean statistical differences  
339 among treatments (p<0.05).

340

341 Leaf sucrose content was also increased by water deficit but only in plants  
342 originated from mother plants maintained under well-watered conditions, i.e. W/W vs.  
343 W/D (Fig 6A). Curiously, D/W plants had higher leaf sucrose content than W/W ones,  
344 suggesting an influence of mother plants. Such influence was also found in roots, with

345 D/W plants presenting lower sucrose, soluble total sugars and total non-structural  
346 carbohydrates than W/W plants (Fig 6). Reductions in root concentrations of sucrose,  
347 soluble total sugars and total non-structural carbohydrates due to water deficit were  
348 found only in plants obtained from those ones that did not face drought (Fig 6E-H).  
349 When considering the total amount of non-structural carbohydrates in plants (Figure 6I),  
350 D/W plants had higher values than W/W plants and the carbohydrate partitioning  
351 between leaves (86% to 91%) and roots (9% to 15%) was similar among treatments (Fig  
352 6J).

353

354 **Fig 6. Leaf and root carbohydrates and their partitioning in daughter plants under**  
355 **water deficit.**

356 Sucrose (*A, E*) soluble sugars (*B, F*), starch (*C, G*) and non-structural carbohydrates (*D, H*)  
357 in leaves (*A-D*) and roots (*E-H*), amount of total non-structural carbohydrates in the  
358 entire plant (*I*) and their partitioning among plant organs (*J*) in sugarcane plants grown  
359 under well-watered conditions (W/W and D/W) or subjected to water deficit (W/D and  
360 D/D). Daughter plants were obtained from mother plants previously exposed to water  
361 deficit (D/W and D/D) or grown under well-watered conditions (W/W and W/D).  
362 Measurements were taken after 9 days of water deficit (maximum water deficit). Each  
363 histogram is the mean values + s.d. (n=4). Different letters mean statistical differences  
364 among treatments (p<0.05).

365

366 Regarding the antioxidant metabolism, leaf SOD and CAT activities were not  
367 affected either by water regime or plant origin (Fig 7A,D), while leaf H<sub>2</sub>O<sub>2</sub> concentration  
368 and leaf APX activity increased due to water deficit (Fig 7B,C). The highest leaf APX



369 activity was found in W/D plants (Fig 7C). In roots, non-significant changes were found  
370 for SOD and APX activities (Fig 7E,G). Root H<sub>2</sub>O<sub>2</sub> concentration and CAT activity increased  
371 due to water deficit in daughter plants originated from well-watered mother plants (Fig  
372 7F,H). On the other hand, root H<sub>2</sub>O<sub>2</sub> concentration was reduced and root CAT activity  
373 did not change under water deficit when considering daughter plants originated from  
374 plants grown under cycles of water deficit (Fig 7F,H). Interestingly, D/W plants had  
375 higher root H<sub>2</sub>O<sub>2</sub> concentration and higher root CAT activity than W/W plants (Fig 7F,H).  
376

377 **Fig 7. Antioxidant metabolism in daughter plants under water deficit.**

378 Activities of SOD (A, E), APX (C, G), CAT (D, H) and H<sub>2</sub>O<sub>2</sub> concentration (B, F) in leaves (A-  
379 D) and roots (E-H) of sugarcane plants grown under well-watered conditions (W/W and  
380 D/W) or subjected to water deficit (W/D and D/D). Daughter plants were obtained from  
381 mother plants previously exposed to water deficit (D/W and D/D) or grown under well-  
382 watered conditions (W/W and W/D). Measurements were taken after 9 days of water  
383 deficit (maximum water deficit). Each histogram is the mean values + s.d. (n=4).  
384 Different letters mean statistical differences among treatments (p<0.05).

385

386 Water deficit reduced shoot biomass production regardless plant origin, but D/D  
387 plants had higher shoot biomass than W/D plants (Fig 8A). While daughter plants  
388 obtained from well-watered mother plants presented increases in root biomass under  
389 water deficit, the opposite was found in daughter plants obtained from mothers that  
390 experienced cycles of water deficit (Fig 8B). In general, root biomass of D/W plants was  
391 about four times higher than one of W/W plants, with D/D plants showing similar root  
392 biomass as compared to W/D plants. Leaf area was also reduced by water deficit (Fig

393 8C), but D/D plants had higher leaf area than daughter plants obtained from well-  
394 watered mothers, despite the water regime.

395

396 **Fig 8. Biomass accumulation by daughter plants under water deficit.**

397 Leaf (A) and root (B) dry matter and leaf area (C) in sugarcane plants grown under well-  
398 watered conditions (W/W and D/W) or subjected to water deficit (W/D and D/D).

399 Daughter plants were obtained from mother plants previously exposed to water deficit  
400 (D/W and D/D) or grown under well-watered conditions (W/W and W/D).

401 Measurements were taken at the end of experiment. Each histogram is the mean values  
402  $\pm$  s.d. (n=4). Different letters mean statistical differences among treatments (p<0.05).

403

## 404 **Discussion**

405       Herein, we induced transgenerational stress memory through vegetative  
406 propagation of sugarcane by inducing cycles of water deficit to mother plants.

407 Epigenetic changes caused by varying environmental conditions help plants to adapt and  
408 have advantageous growth and acclimation under unstable environments [13]. Such

409 epigenetic changes may manifest in the future generations, a transgenerational stress  
410 memory if mother plants were previously stressed [14]. Although sugarcane

411 propagation does not involve meiotic recombination, mitotic alterations during  
412 vegetative propagation may also produce a source of epigenetic variation that helps

413 plants to persist and succeed in environmental colonization [13].

414       Our findings indicate that propagules obtained from plants growing in areas with  
415 low water availability would be more tolerant to drought as compared to propagules of

416 the same genotype grown under irrigation of in areas without occurrence of water  
417 deficit. Interestingly, daughters of mother plants that faced water deficit produced more  
418 biomass than ones from mother plants maintained well-watered, regardless water  
419 regime (Fig 8). This suggest that plants have increased their efficiency in using natural  
420 resources such as water and sunlight through the transgenerational stress memory. We  
421 have shown recently that stress memory is induced in sugarcane plants after three  
422 cycles of water deficit, with plants showing higher photosynthesis and improved growth  
423 under water limiting conditions [5]. Those previous results together with ones reported  
424 herein indicate that drought tolerance of sugarcane could be improved by water  
425 management and by selecting the propagation material for planting new crop fields.

426         When exposing mother plants to water deficit, stress memory was induced and  
427 the information likely stored in bud meristems, as suggested by improved performance  
428 of daughter plants obtained by vegetative propagation. Besides causing decreases in  
429 photosynthesis (S1 Fig) and biomass production (S2 Fig; S1 Table), cycles of dehydration  
430 and rehydration are able to create a number of chemical signals, such as increases in  
431 concentration of abscisic acid (ABA), a hormone that alter the expression pattern of  
432 many genes linked to drought response [31]. Changes in gene expression patterns might  
433 be stored through epigenetic changes such as DNA methylation and acetylation and  
434 induce stress memory [32]. In spite of a large decrease in biomass production of mother  
435 plants under water deficit (S2 Fig; S1 Table), daughter plants had faster sprouting and  
436 higher biomass than ones obtained from well-hydrated mother plants (Fig 8). Such  
437 improved plant growth due to the transgenerational stress memory was reported  
438 previously and it is likely linked to changes in DNA methylation [8], a research topic that

439 should be further investigated for revealing the molecular bases of stress memory and  
440 tolerance in sugarcane.

441 The ability of clone plants in recovering the stored environmental information  
442 [15] can explain both morphological and physiological responses of D/D plants. D/D  
443 plants exhibited higher photosynthesis than W/D plants at recovery and this was caused  
444 by higher instantaneous carboxylation efficiency (Fig 1A,C). Regarding primary  
445 photochemistry, non-photochemical quenching was lower in D/D plants than in W/D  
446 plants, indicating less dissipation of energy as heat in the former ones (Fig 4D). Another  
447 interesting index suggesting stress memory is the water use efficiency [31], which  
448 indicates an optimization of CO<sub>2</sub> assimilation per unit of H<sub>2</sub>O transpired in D/D plants  
449 under water limiting conditions (Fig 2C).

450 Interestingly, D/D plants were able to maintain metabolic activity and produce  
451 more biomass than W/D plants (Fig 8) even presenting lower leaf water potential (Fig  
452 3A). As RWC was similar in W/D and D/D plants (Fig 3), our data indicate the occurrence  
453 of more intense osmotic adjustment in D/D plants. This can be explained by higher  
454 concentration of proline in leaves (Fig 5), an osmotic and osmoprotectant molecule [33].  
455 During stressful conditions, high proline levels in D/D plants suggest that these plants  
456 have synthesized this osmolyte for adjusting the osmotic equilibrium and cell  
457 homeostasis, one form of memory according to [34]. After rehydration, there was a large  
458 degradation of proline in D/D plants, which would increase the remobilization of  
459 nitrogen to assimilatory pathways for resuming plant growth. Evidence of  
460 transgenerational stress memory was found even at the last day of rehydration, when  
461 D/D plants had higher photosynthesis ( $25.7 \pm 2.7$  vs.  $15.7 \pm 3.8$   $\mu\text{mol m}^{-2} \text{s}^{-1}$ ) and integrated  
462 water use efficiency ( $7.2 \pm 0.3$  vs.  $6.3 \pm 0.4$   $\mu\text{mol mol}^{-1}$ ) than W/D plants.

463           Plants respond to abiotic stresses by altering their metabolism and accumulating  
464 substances such as sugars, amino acids and other metabolites with important roles in  
465 stress tolerance [35]. Maintenance of high sucrose concentration even under well-  
466 watered conditions may be another evidence of stress memory [36], as found in D/W  
467 plants (Fig 6A). In addition, plants obtained from mother plants that faced drought did  
468 not present any change in both leaf and root sucrose concentrations under water deficit  
469 (Fig 6A,E). Sucrose accumulation would help plants under water deficit by improving  
470 osmoregulation and protecting proteins and then maintaining photosynthesis under low  
471 water availability.

472           Low concentrations of ROS in plants previously exposed to stressful conditions  
473 could be an indication of stress memory [37]. However, our data indicate that exposure  
474 of mother plants to water deficit caused higher root H<sub>2</sub>O<sub>2</sub> concentration in plants  
475 maintained under well-watered conditions (Fig 7F). In addition to its role in plant  
476 signaling [38], ROS accumulation is also associated with modifications in DNA  
477 methylation pattern [39], an epigenetic change that would store information and induce  
478 faster stress response. The presence of ROS in controlled amounts is important for plant  
479 growth, with plants showing higher H<sub>2</sub>O<sub>2</sub> concentration in the region of root elongation  
480 [37]. In this way, high root H<sub>2</sub>O<sub>2</sub> concentration in D/W plants (Fig 7F) would explain high  
481 root biomass (Fig 7F and 8B). In fact, H<sub>2</sub>O<sub>2</sub> is produced by mitochondria during the  
482 synthesis of NADH and ATP for supplying aerobic plant metabolism in active growing  
483 regions [40].

484           Based on results reported herein, the next step towards the improvement of  
485 drought tolerance in sugarcane plants would be the evaluation of field-grown plants,

486 considering the persistence of stress memory and its consequences for crop yield and  
487 biomass production as well as the genotypic variation within *Saccharum* complex.

488

## 489 **Conclusion**

490 Our findings clearly show that sugarcane growth is improved in daughter plants  
491 obtained from mother plants that faced water deficit. The bases of such  
492 transgenerational stress memory should be further studied taking into account possible  
493 epigenetic markers. Our data also revealed that bud meristems of sugarcane are able to  
494 store information acquired from previous stressful events. Accumulation of H<sub>2</sub>O<sub>2</sub> in  
495 roots is a possible chemical signal related to stress memory, being associated with  
496 improved root growth in well-watered plants. Benefits of such stress memory were  
497 noticed in leaf gas exchange and plants showed improved photosynthetic water use  
498 efficiency and faster recovery of photosynthesis after rehydration. As consequence,  
499 daughter plants obtained from stressed mothers exhibited improvements in biomass  
500 production, regardless of water conditions. Finally, our results bring a new perspective  
501 for the management of sugarcane fields as plant performance could be improved under  
502 field conditions due to a large root system and faster recovery of photosynthesis after  
503 facing water shortage.

504

## 505 **Author contributions**

506 Conception and experimental design - Fernanda C C Marcos and Rafael V Ribeiro; Data  
507 collection - Fernanda C C Marcos, Neidiquele M Silveira and Paulo E R Marchiori; Data  
508 analysis and interpretation - Fernanda C C Marcos, Eduardo C Machado, Gustavo M

509 Souza and Rafael V Ribeiro; Drafting of the article - Fernanda C C Marcos and Rafael V  
510 Ribeiro; Critical revision and final approval of the article - all authors.

511

## 512 **Conflict of interest statement**

513 The authors declare that this research was conducted in the absence of any commercial  
514 or financial relationships that could be construed as a potential conflict of interest.

515

## 516 **References**

517 1. Ribeiro, RV, Machado, RS, Machado, EC, Machado, DFSP, Magalhães filho, JR, Landell,  
518 MGA. Revealing drought-resistance and productive patterns in sugarcane genotypes  
519 by evaluating both physiological responses and stalk yield. *Experimental Agriculture*.  
520 2013; 49, 212-224. <https://doi.org/10.1017/S0014479712001263>

521 2. Sales, CRG, Marchiori, PER, Machado, RS, Fontenele, AV, Machado, EC, Silveira, JAG,  
522 Ribeiro, RV. Photosynthetic and antioxidant responses to drought during the  
523 sugarcane ripening? *Photosynthetica*. 2015; 53, 547-554.  
524 <https://doi.org/10.1007/s11099-015-0146-x>

525 3. Bruce, TJA, Matthes, MC, Napier, JA, Pickett, JA. Stressful “memories” of plants:  
526 Evidence and possible mechanisms. *Plant Science*. 2007; 173, 603-608.  
527 <https://doi.org/10.1016/j.plantsci.2007.09.002>

528 4. Galle, A, Florez-Sarasa, I, El Aououad, H, Flexas, J. (2011). The Mediterranean  
529 evergreen *Quercus ilex* and the semideciduous *Cistus albidus* differ in their leaf gas  
530 exchange regulation and acclimation to repeated drought and re-watering cycles.

- 531 Journal of Experimental Botany. 2011; 62, 5207-5216.  
532 <https://doi.org/10.1093/jxb/err233>
- 533 5. Marcos, FCC, Silveira, NM, Mokochinski, J B, Sawaya, ACHF, Marchiori, PER, Machado,  
534 EC, Souza, GM, Landell, MGA, Ribeiro, RV. Drought tolerance of sugarcane is  
535 improved by previous exposure to water deficit. Journal of Plant Physiology. 2018;  
536 223, 9-18. <https://doi.org/10.1016/j.jplph.2018.02.001>
- 537 6. Walter, J, Jentsch, A, Beierkuhnlein, C, and Kreyling, J. Ecological stress memory and  
538 cross tolerance in plants in the face of climate extremes. Environmental and  
539 Experimental Botany. 2013; 94, 3-8.  
540 <https://doi.org/10.1016/j.envexpbot.2012.02.009>
- 541 7. Izanloo, A, Condon, AG, Langridge, P, Tester, M, Schnurbusch, T. Different  
542 mechanisms of adaptation to cyclic water stress in two South Australian bread wheat  
543 cultivars. Journal of Experimental Botany. 2008; 59, 3327-3346.  
544 <https://doi.org/10.1093/jxb/ern199>
- 545 8. Hauser, MT, Aufsatz, W, Jonak, C, Luschnig, C. Transgenerational epigenetic  
546 inheritance in plants. Biochim Biophys Acta. 2011; 1809, 459-468.  
547 <https://doi.org/10.1016/j.bbagrm.2011.03.007>
- 548 9. Ding, Y, Fromm, M, Avramova, Z. Multiple exposures to drought “train” transcriptional  
549 responses in *Arabidopsis*. Nature Communication. 2012; 3, 740.  
550 <https://doi.org/10.1038/ncomms1732>
- 551 10. Thellier, M, Lüttge, U. Plant memory: a tentative model. Plant Biology. 2012; 15, 1-  
552 12. <https://doi.org/10.1111/j.1438-8677.2012.00674.x>



- 553 11. Chinnusamy, V, Zhu,JK. Epigenetic regulation of stress responses in plants. Current  
554 Opinion in Plant Biology. 2009; 12, 133-139.  
555 <https://doi.org/10.1016/j.pbi.2008.12.006>
- 556 12. Boyko, A, Kovalchuk, I. Genome instability and epigenetic modification—heritable  
557 responses to environmental stress? Current Opinion in Plant Biology. 2011; 14, 260-  
558 266. <https://doi.org/10.1016/j.pbi.2011.03.003>
- 559 13. Dodd, R, Douhovnikoff, V. Adjusting to Global Change through Clonal Growth and  
560 Epigenetic Variation. Frontiers in Ecology and Evolution. 2016; 4, 86.  
561 <https://doi.org/10.3389/fevo.2016.00086>
- 562 14. Boyko, A, Blevins, T, Yao, Y, Golubov,A, Bilichak, A, Ilnytskyy, Y, Hollander, J, Meins,  
563 Jr F, Kovalchuk, I. Transgenerational adaptation of Arabidops is to stress requires DNA  
564 methylation and the function of dicer-like proteins. PlosONE. 2010; 5, e9514.  
565 <https://doi.org/10.1371/journal.pone.0009514>
- 566 15. Latzel, V, Rendina González, AP, Rosenthal, J. Epigenetic Memory as a Basis for  
567 Intelligent Behavior in Clonal Plants. Front Plant Science. 2016; 7, 1354.  
568 <https://doi.org/10.3389/fpls.2016.01354>
- 569 16. Dos Santos, HG. Sistema Brasileiro de Classificação de solos. 3th ed. Brasília, DF.:  
570 Embrapa; 2013.
- 571 17. Dias, FL, Rosseto, R. Calagem e adubação da cana-de-açúcar. In: Atualização em  
572 produção de cana-de-açúcar, ed Segato, SV, Pinto, A S Jendiroba, Nóbrega, JCM.  
573 Piracicaba: Livro Ceres, 2016. pp.107-119.
- 574 18. Sarruge, JR. Soluções nutritivas. Summa Phytopathologica. 1975; 1, 231-233.  
575 [http://www.scielo.br/scielo.php?script=sci\\_nlinks&ref=000052&pid=S0071-](http://www.scielo.br/scielo.php?script=sci_nlinks&ref=000052&pid=S0071-)  
576 [1276197800010001700009&lng=es](http://www.scielo.br/scielo.php?script=sci_nlinks&ref=000052&pid=S0071-1276197800010001700009&lng=es)

- 577 19. Edwards, GE, Baker, NR. Can CO<sub>2</sub> assimilation in maize leaves be predicted accurately  
578 from chlorophyll fluorescence analysis? *Photosynth Research*. 1993; 37, 89-102.  
579 <https://doi.org/10.1007/BF02187468>
- 580 20. Baker NR. Chlorophyll Fluorescence: A probe of photosynthesis: *in vivo*. Annual  
581 Review of Plant Biology. 2008; 59, 89-113.  
582 <https://doi.org/10.1146/annurev.arplant.59.032607.092759>
- 583 21. Weatherley, PE. Studies in the water relations of the cotton plant. I. The field  
584 measurement of water deficits in leaves. *New Phytologist*. 1950; 49, 81-87.  
585 <https://doi.org/10.1111/j.1469-8137.1950.tb05146.x>
- 586 22. Bieleski, RL, Turner, A. Separation and estimation of amino acids in crude plant  
587 extracts by thinx'-layer electrophoresis and chromatography.  
588 *Analytical Biochemistry*. 1966; 17, 278-293. [https://doi.org/10.1016/0003-](https://doi.org/10.1016/0003-2697(66)90206-5)  
589 [2697\(66\)90206-5](https://doi.org/10.1016/0003-2697(66)90206-5)
- 590 23. Dubois, M, Gilles, KA, Hamilton, JK, Rebers, PA, Smith, F. Colorimetric method for  
591 determination of sugars and related substances. *Analytical Biochemistry*. 1956; 28,  
592 350-356. <https://doi.org/10.1021/ac60111a017>
- 593 24. Van Handel, E. Direct microdetermination of sucrose. *Analytical Biochemistry*. 1968;  
594 22, 280-283. [https://doi.org/10.1016/0003-2697\(68\)90317-5](https://doi.org/10.1016/0003-2697(68)90317-5)
- 595 25. Amaral, LIV, Gaspar, M, Costa, PMF, Aidar, MPM, Buckeridge, MS. Novo método  
596 enzimático rápido e sensível de extração e dosagem de amido em materiais vegetais.  
597 *Hoehnea*. 2007; 34, 425-431. <http://dx.doi.org/10.1590/S2236-89062007000400001>
- 598 26. Rena, AB, Masciotti, GZ. The effect of dehydration on nitrogen metabolism and  
599 growth of bean cultivars (*Phaseolus vulgaris* L.). *Ceres*. 1976; 23, 288-301.

- 600 [http://www.scielo.br/scielo.php?script=sci\\_nlinks&ref=000041&pid=S0006-](http://www.scielo.br/scielo.php?script=sci_nlinks&ref=000041&pid=S0006-)
- 601 [8705198100010000500010&lng=en](http://www.scielo.br/scielo.php?script=sci_nlinks&ref=000041&pid=S0006-8705198100010000500010&lng=en)
- 602 27. Alexieva V, Sergiev I, Mapelli S, and Karanov E. The effect of drought and ultraviolet
- 603 radiation on growth and stress markers in pea and wheat. *Plant Cell Environment*
- 604 2001; 24, 1337-1344. <https://doi.org/10.1046/j.1365-3040.2001.00778.x>
- 605 28. Giannopolitis, O, Ries SK. Superoxide dismutase: I. Occurrence in higher plants. *Plant*
- 606 *Physiology*. 1977; 59, 309-14. <https://doi.org/10.1104/pp.59.2.309>
- 607 29. Havir, EA, McHale NA. Biochemical and development characterization of multiples
- 608 forms of catalase in Tobacco-leaves. *Plant Physiology*. 1987; 84, 450-
- 609 455. <https://doi.org/10.1104/pp.84.2.450>
- 610 30. Nakano, Y, Asada, K. Hydrogen peroxide is scavenged by ascorbate-specific
- 611 peroxidase in spinach chloroplasts. *Plant Cell Physiology*. 1981; 22, 867-880.
- 612 <https://doi.org/10.1093/oxfordjournals.pcp.a076232>
- 613 31. Fleta-Soriano, E, Pintó-Marijuan, M, Munné-Bosch, S. Evidence of Drought Stress
- 614 Memory in the Facultative CAM, *Aptenia cordifolia*: Possible Role of Phytohormones.
- 615 *PlosONE*. 2015; 10, e0135391. <https://doi.org/10.1371/journal.pone.0135391>
- 616 32. Avramova, Z. Transcriptional 'Memory' of a Stress; transient chromatin and memory
- 617 (epigenetic) marks at stress response genes. *The Plant Journal*. 2015; 83, 149-159.
- 618 <https://doi.org/10.1111/tpj.12832>
- 619 33. Szabados, L, Savouré, A. Proline: a multifunctional amino acid. *Trends Plant Science*.
- 620 2010; 15, 89-97. <https://doi.org/10.1016/j.tplants.2009.11.009>
- 621 34. Ding, Y, Liu, N, Virilouvet, L, Riethoven, JJ, Fromm, M, Avramova, Z. Four distinct types
- 622 of dehydration stress memory genes in *Arabidopsis thaliana*. *BMC Plant Biology*.
- 623 2013; 13:229. <https://doi.org/10.1186/1471-2229-13-229>

- 624 35. Verlues, PE, Agarwal, M, Katiyar-Agarwal, S, Zhu, J, Zhu, J K. Methods and concepts  
625 in quantifying resistance to drought, salt and freezing, abiotic stress that affect plant  
626 water status. *Plant Journal*. 2006; 45, 523-539. [https://doi.org/10.1111/j.1365-  
627 313X.2005.02593.x](https://doi.org/10.1111/j.1365-313X.2005.02593.x)
- 628 36. Crisp, PA, Ganguly, D, Eichten, SR, Borevitz, J.O., Pogson, B.J. Reconsidering plant  
629 memory: Intersections between stress recovery, RNA turnover, and epigenetics.  
630 *Science Advances*. 2016; 2:e1501340. <https://doi.org/10.1126/sciadv.1501340>
- 631 37. Hu, T, Jinb, Y, Lia, H, Amombo, E, Fua, J. Stress memory induced transcriptional and  
632 metabolic changes of perennial ryegrass (*Lolium perenne*) in response to salt stress.  
633 *Physiologia Plantarum*. 2015; 156, 54-69. <https://doi.org/10.1111/ppl.12342>
- 634 38. Foyer, CH, Noctor, G. Oxidant and antioxidant signalling in plants: a re-evaluation of  
635 the concept of oxidative stress in a physiological context. *Plant Cell Environment*.  
636 2005; 28, 1056-1071. <https://doi.org/10.1111/j.1365-3040.2005.01327.x>
- 637 39. Peng, H, Zang, J. Plant genomic DNA methylation in response to stresses: Potential  
638 applications and challenges in plant breeding. *Progress in Natural Science*. 2009; 19,  
639 1037-1045. <https://doi.org/10.1016/j.pnsc.2008.10.014>
- 640 40. Gill, SS, Tuteja, N. Reactive oxygen species and antioxidant machinery in abiotic  
641 stress tolerance in crop plants. *Plant Physiology and Biochemistry*. 2010; 48, 909-930.  
642 <https://doi.org/10.1016/j.plaphy.2010.08.016>
- 643
- 644

## 645 **Supporting information**

646

### 647 **S1 Fig. Time course of leaf gas exchange in mother plants under water deficit.**

648 Leaf CO<sub>2</sub> assimilation of mother-plants maintained well-watered (W) or subjected to  
649 three cycles of water deficit (D). The grey area represents water withholding (nine  
650 days) and the dotted line indicates null photosynthesis. Each symbol represents the  
651 mean values  $\pm$  s.d. (n = 4).

652

### 653 **S2 Fig. General view of mother plants after water deficit.**

654 Visual aspect of mother plants grown under cycles of water deficit (left) or under well-  
655 watered conditions (right).

656

### 657 **S1 Table. Biomass accumulation by daughter plants under water deficit.**

658 Biometry of mother plants grown under well-watered (reference) conditions or  
659 subjected to cycles of water deficit. Measurements were taken after 80 days of  
660 treatment. Different letters mean statistical differences between treatments (p<0.05).

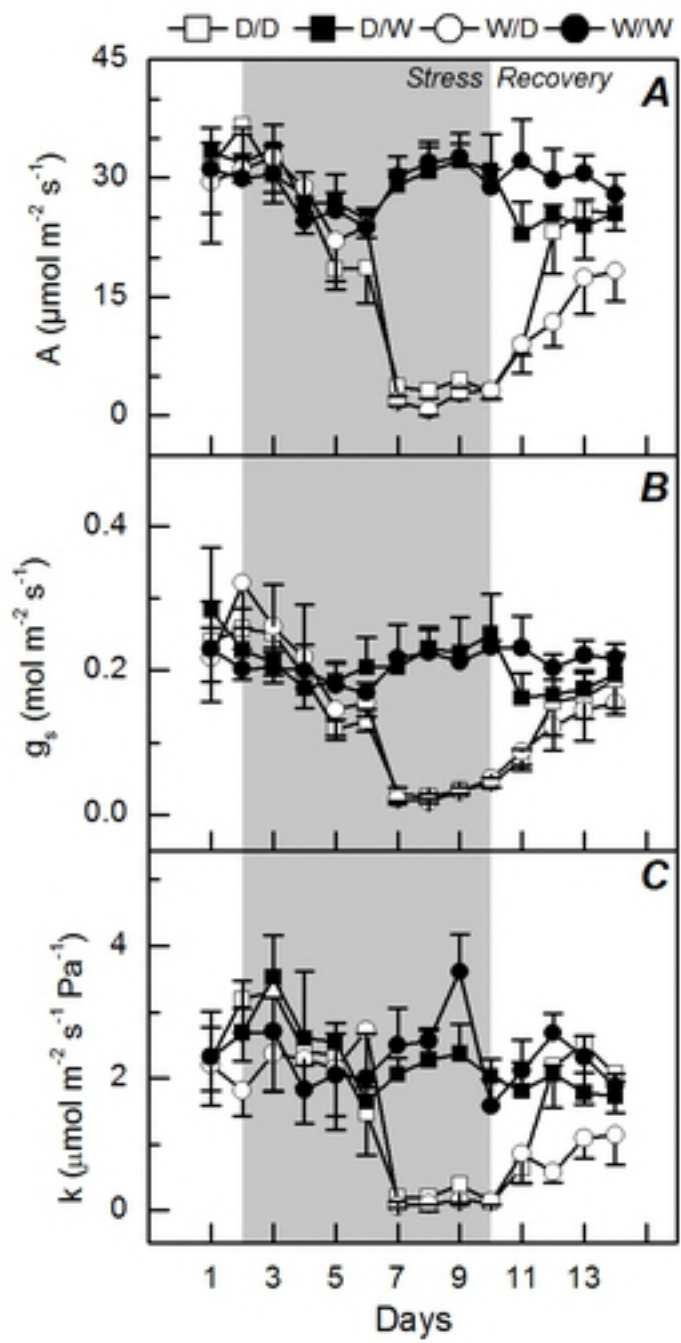

Figure 1

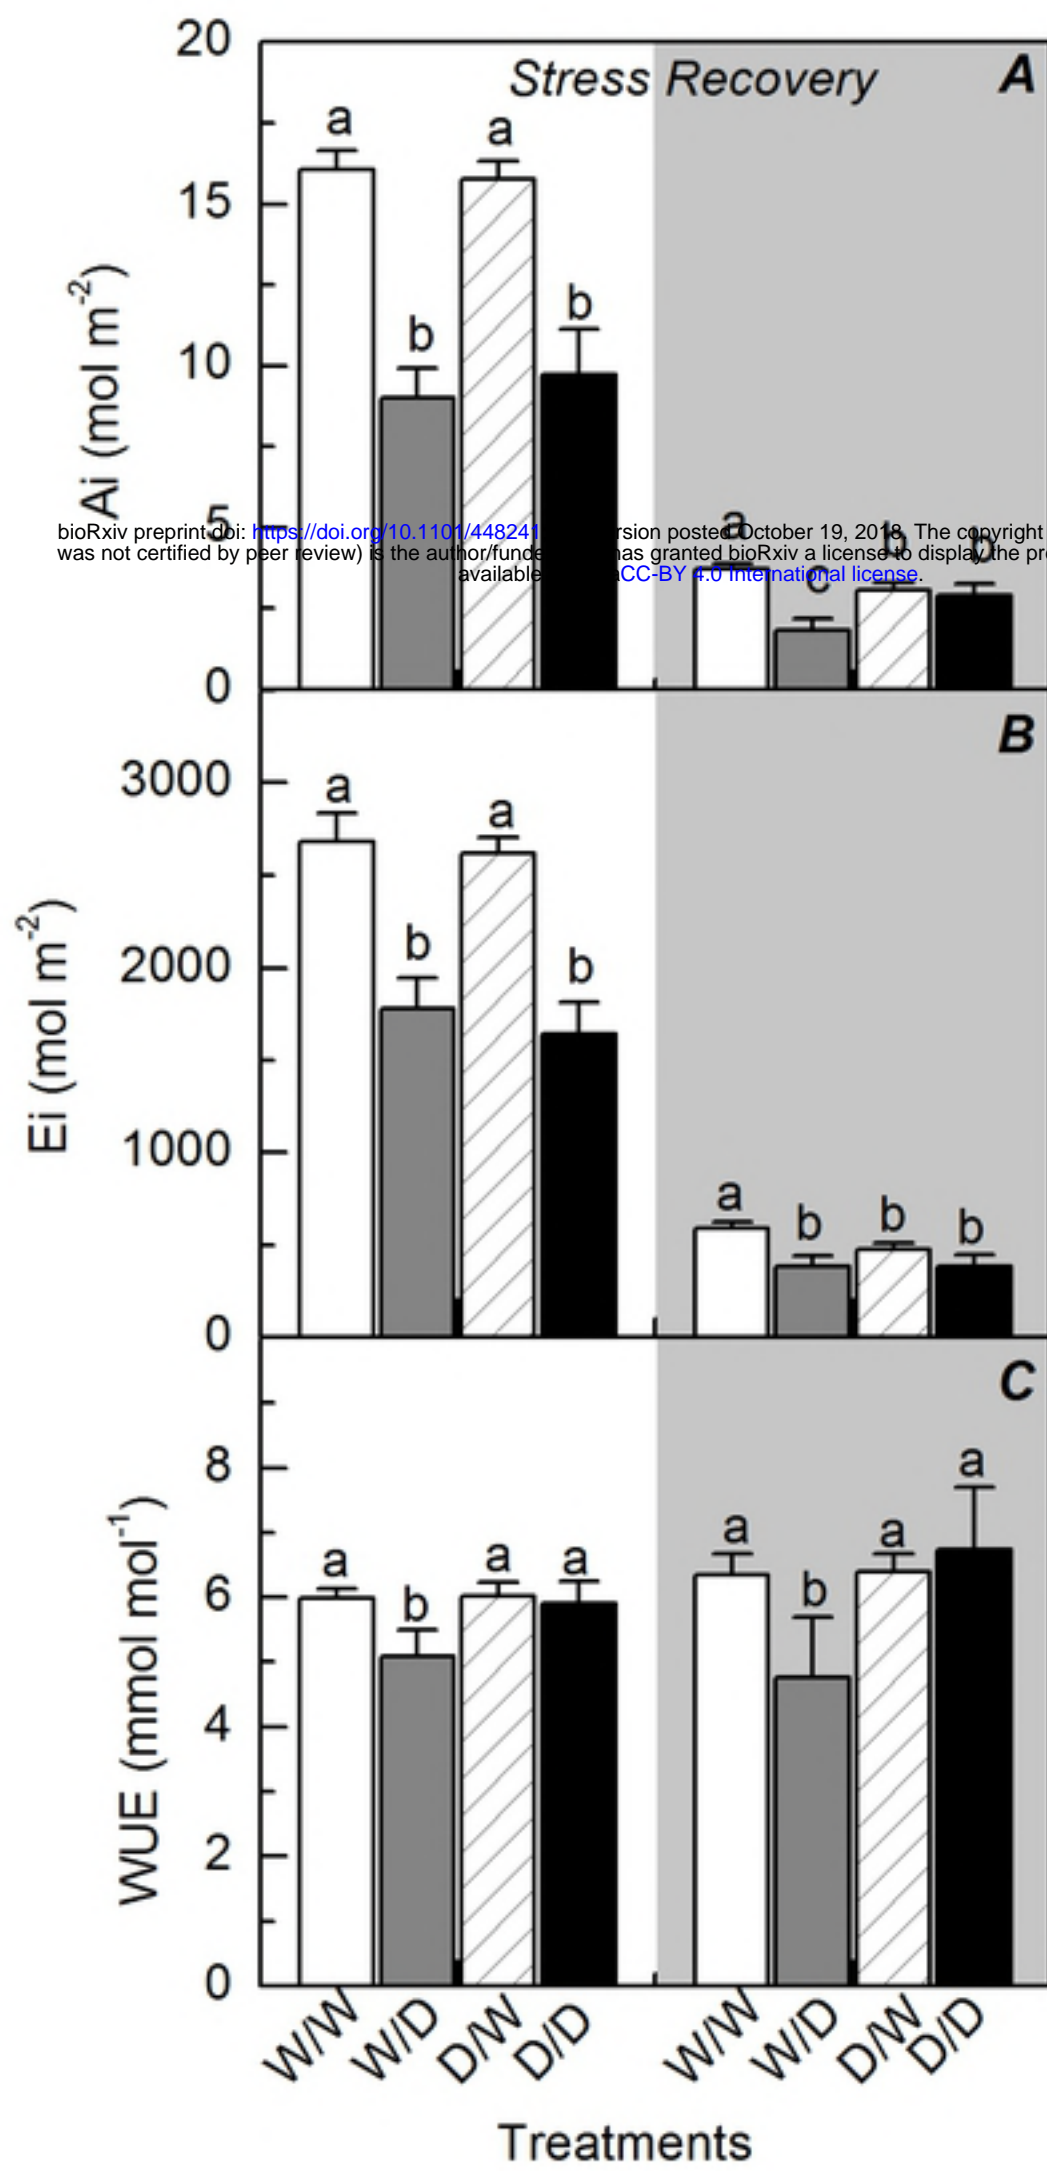

Figure 2

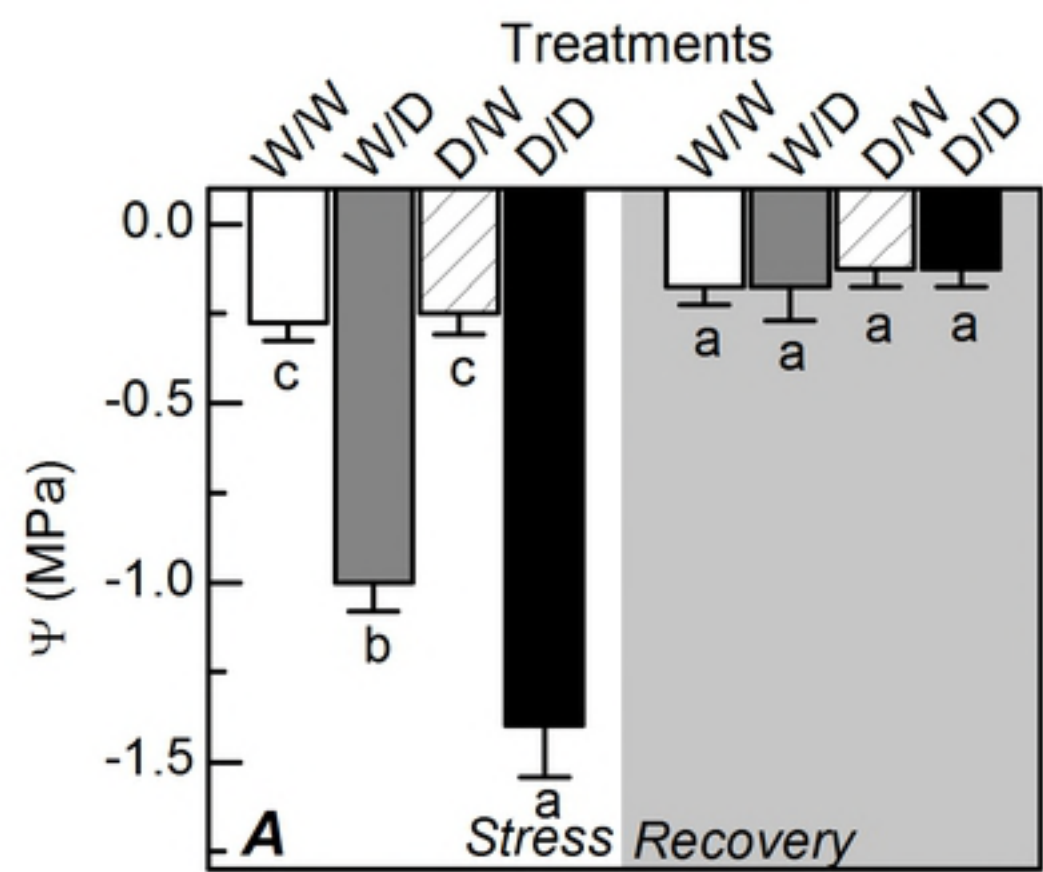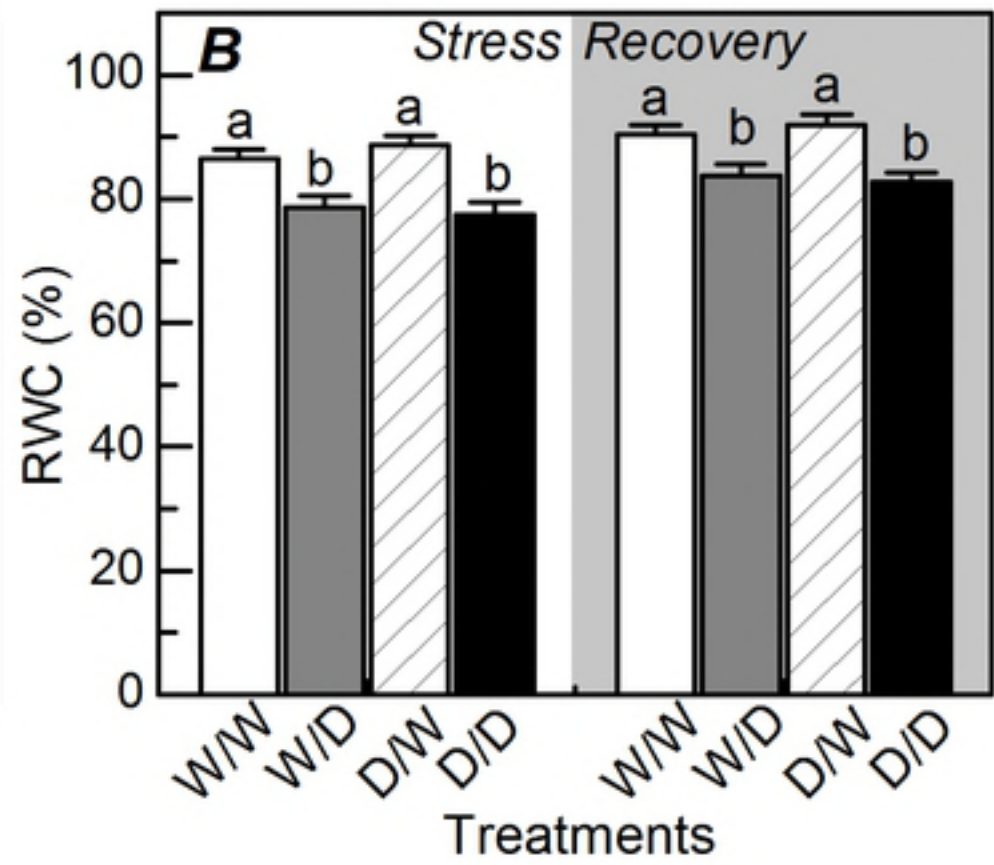

Figure 3



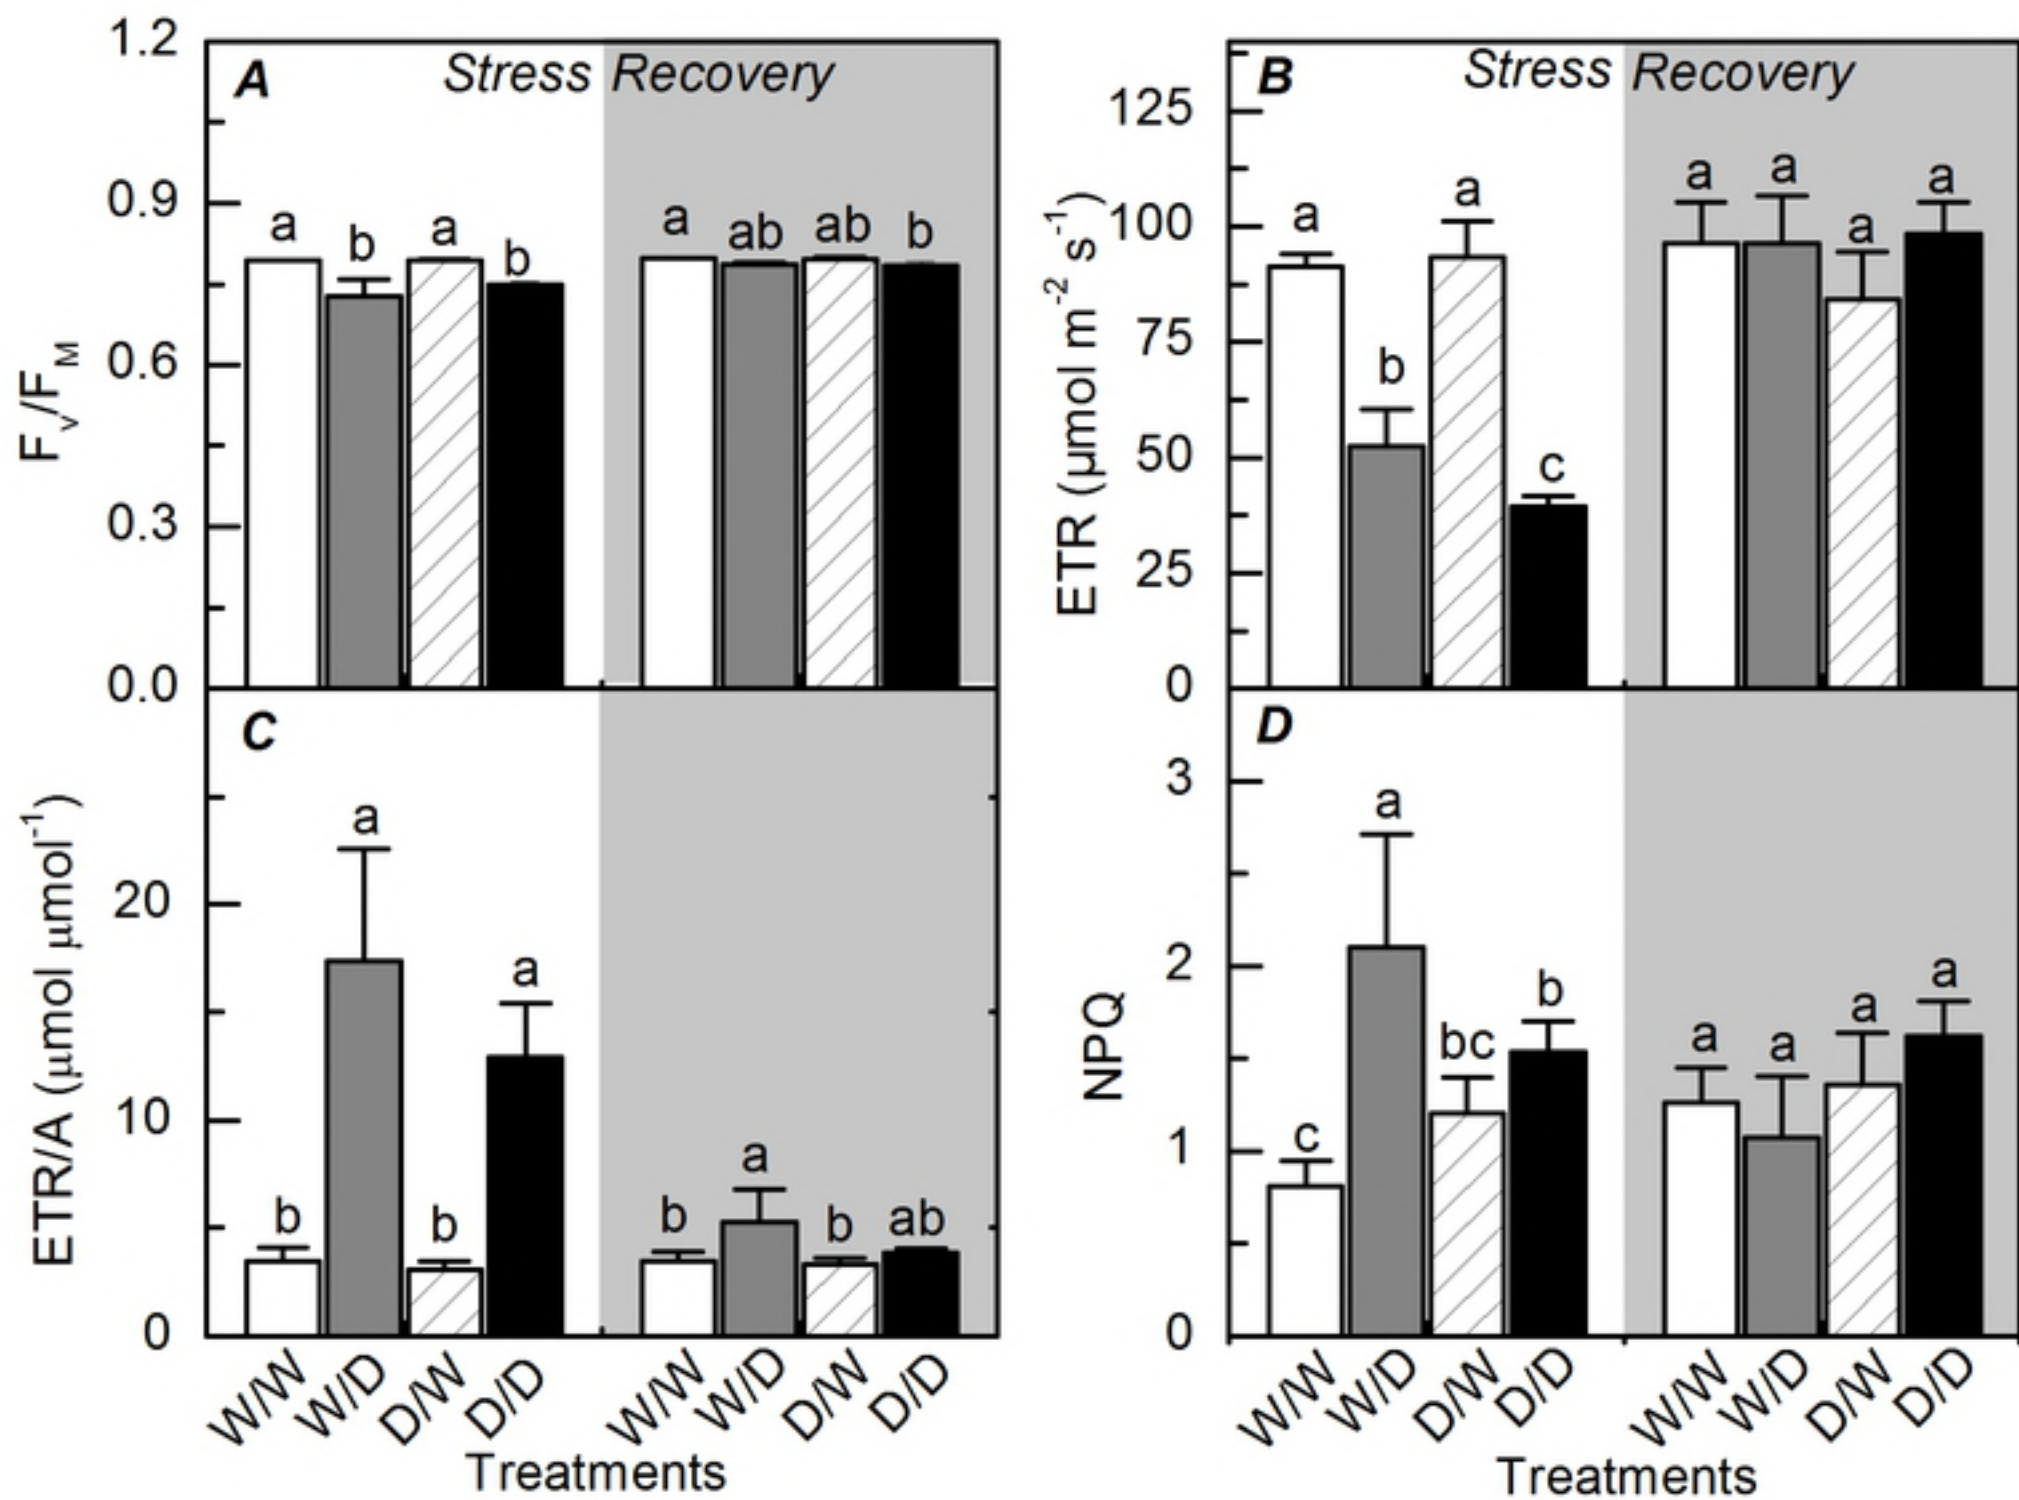

Figure 4

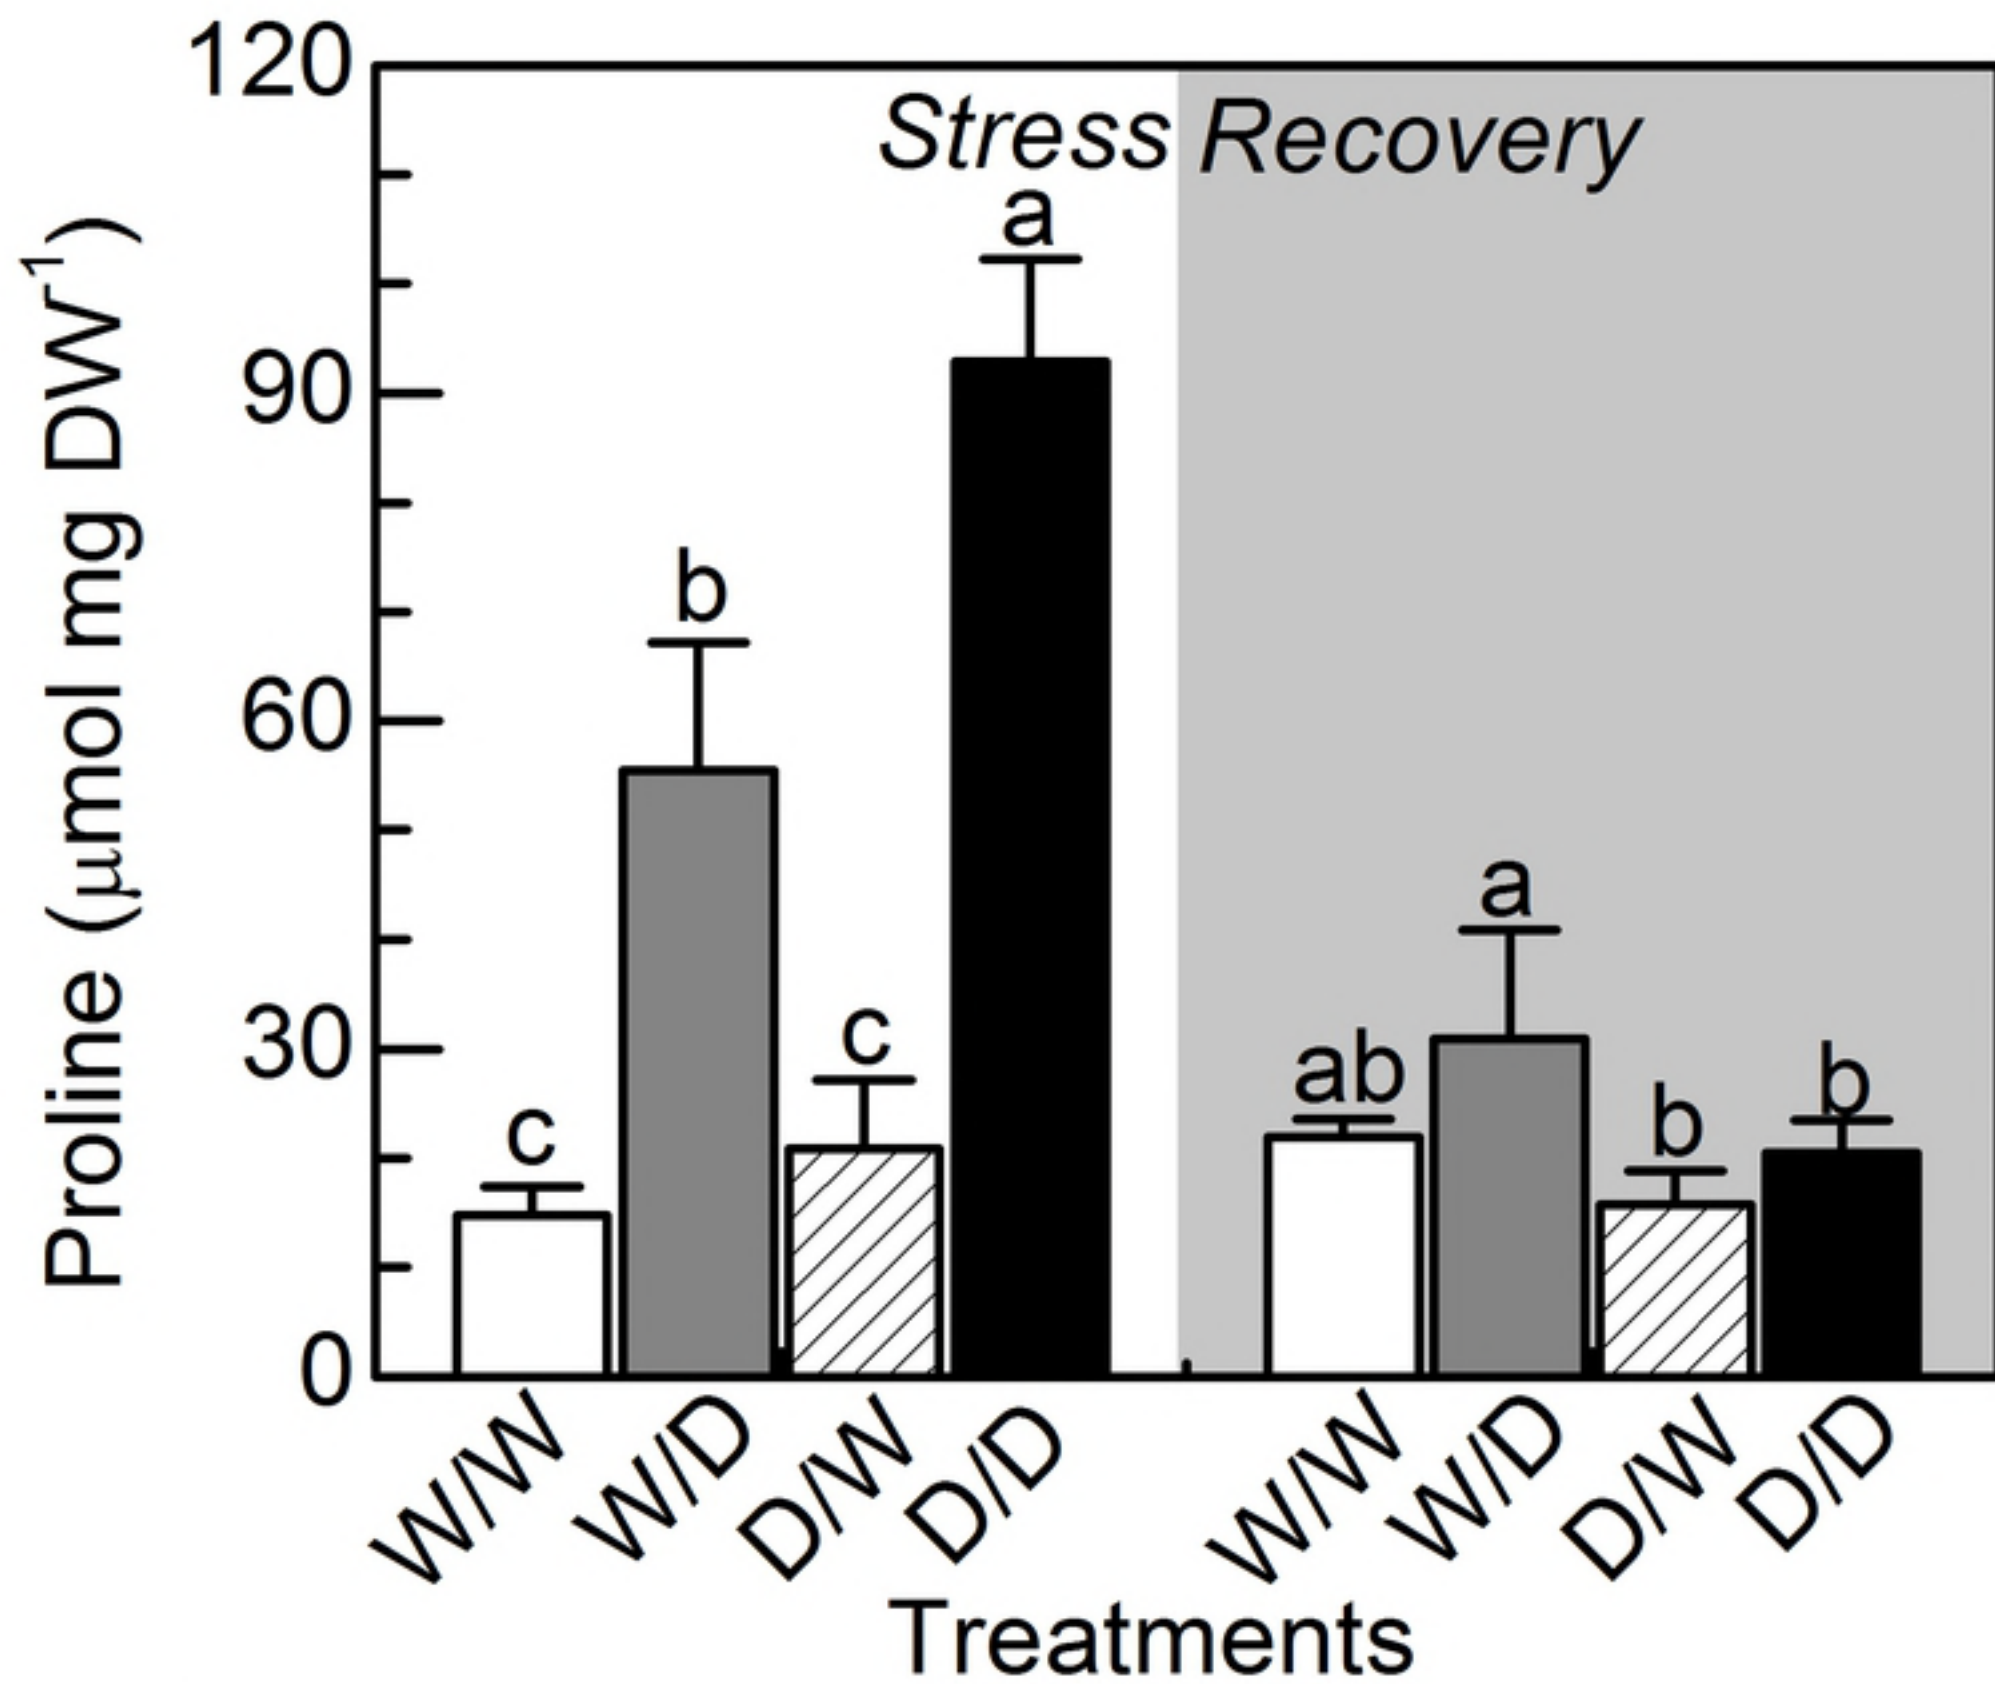

Figure 5

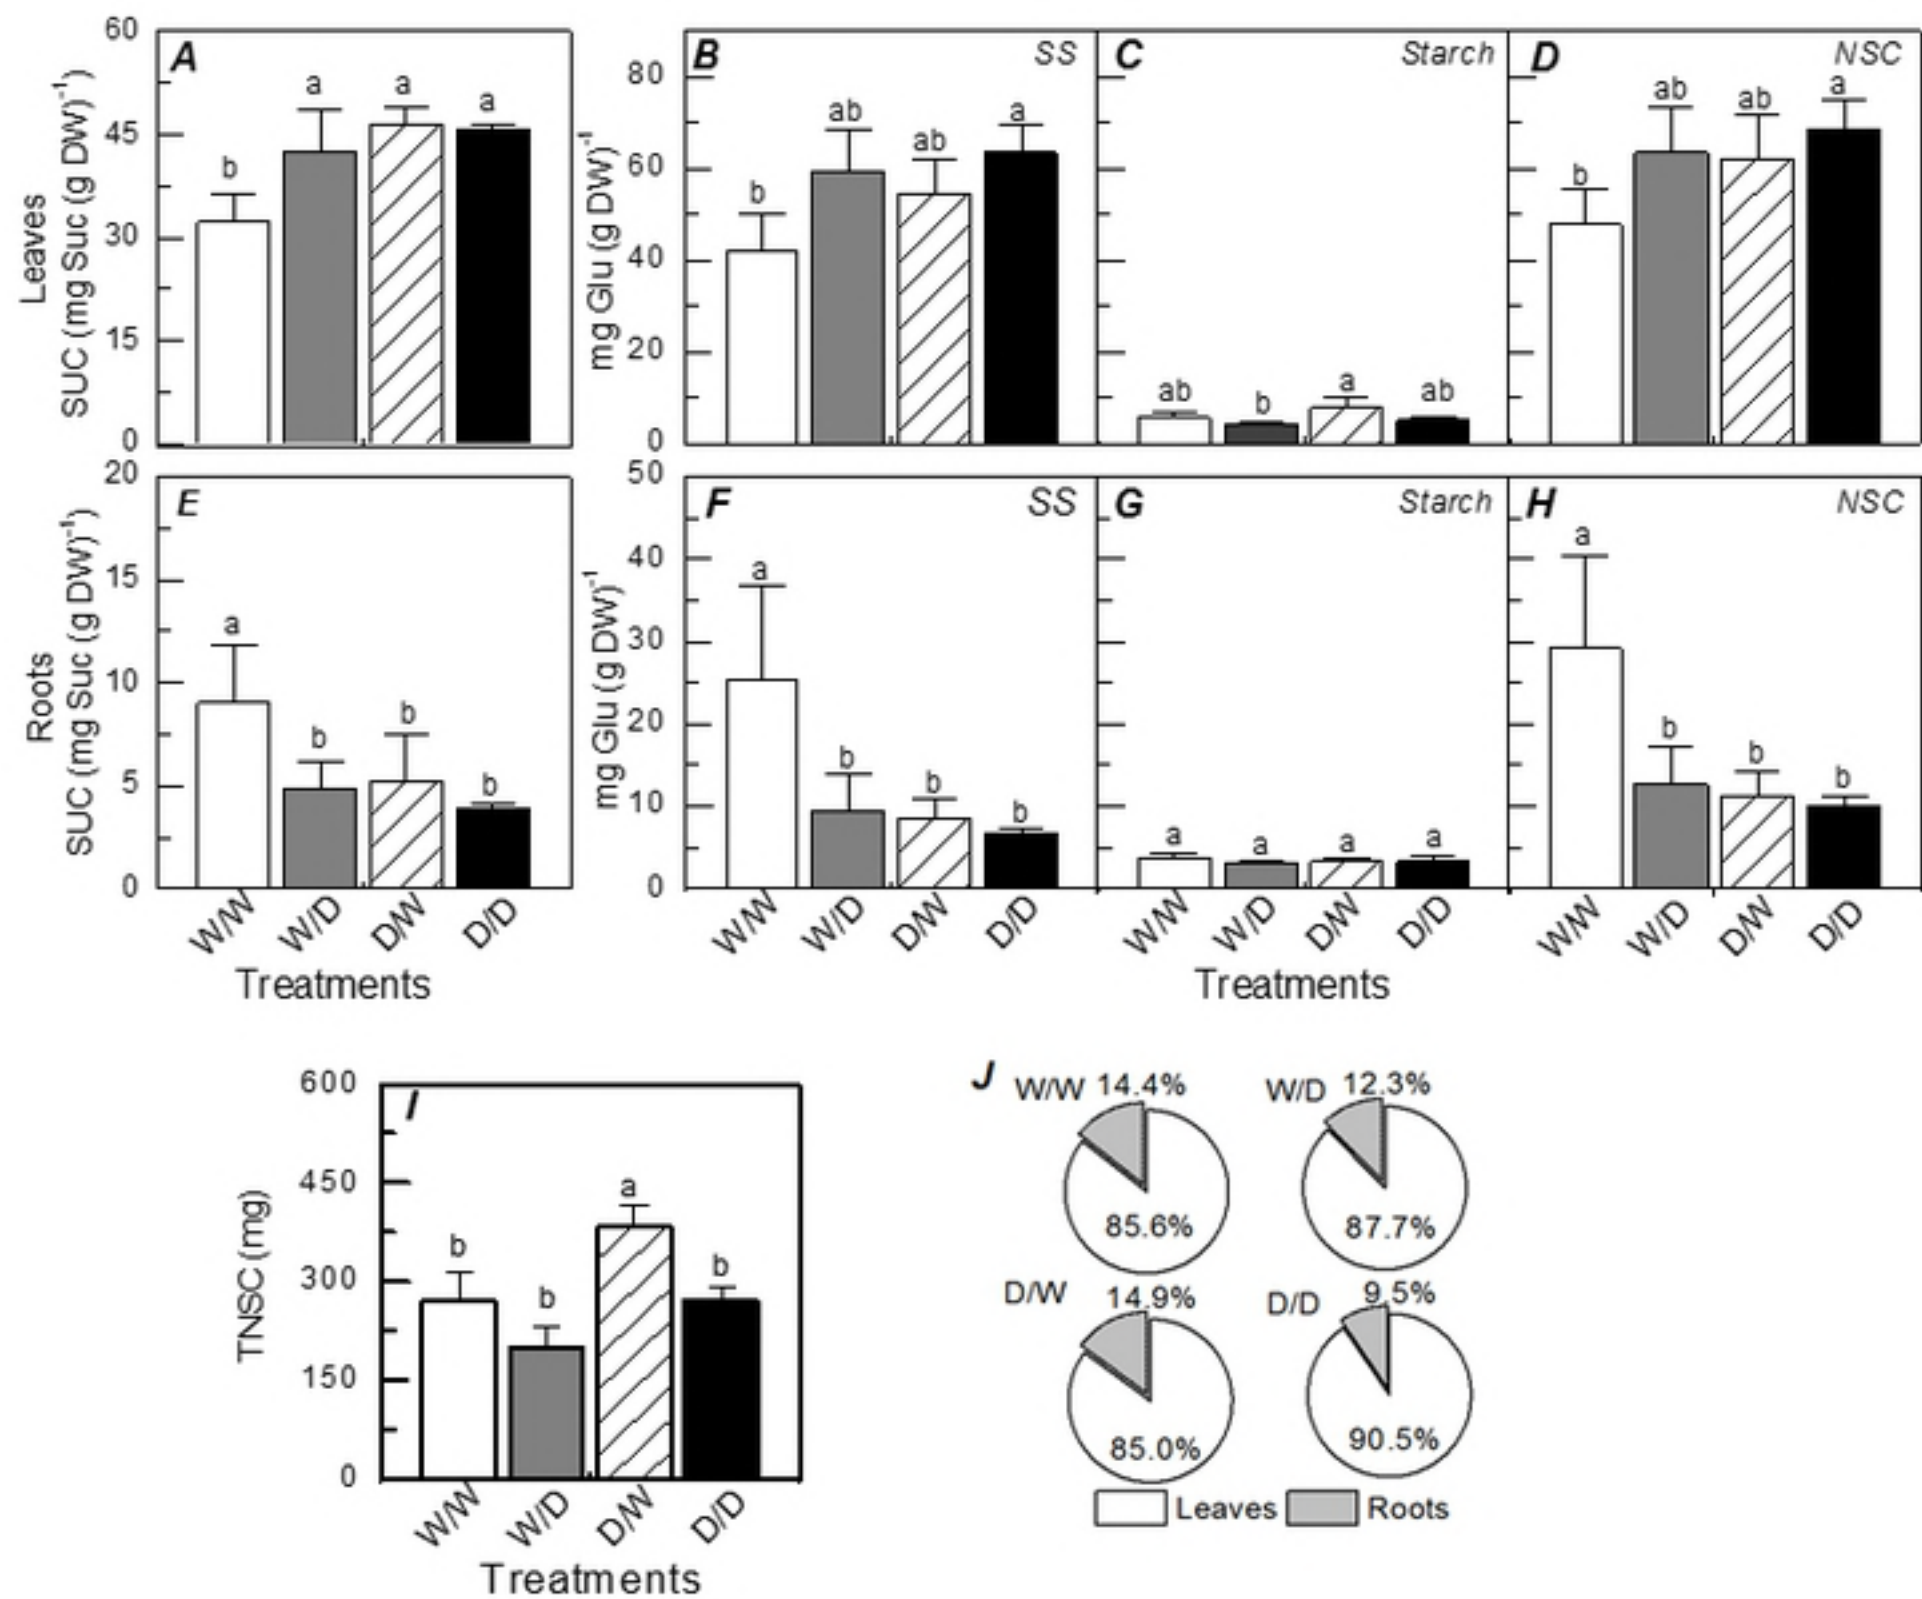

Figure 6

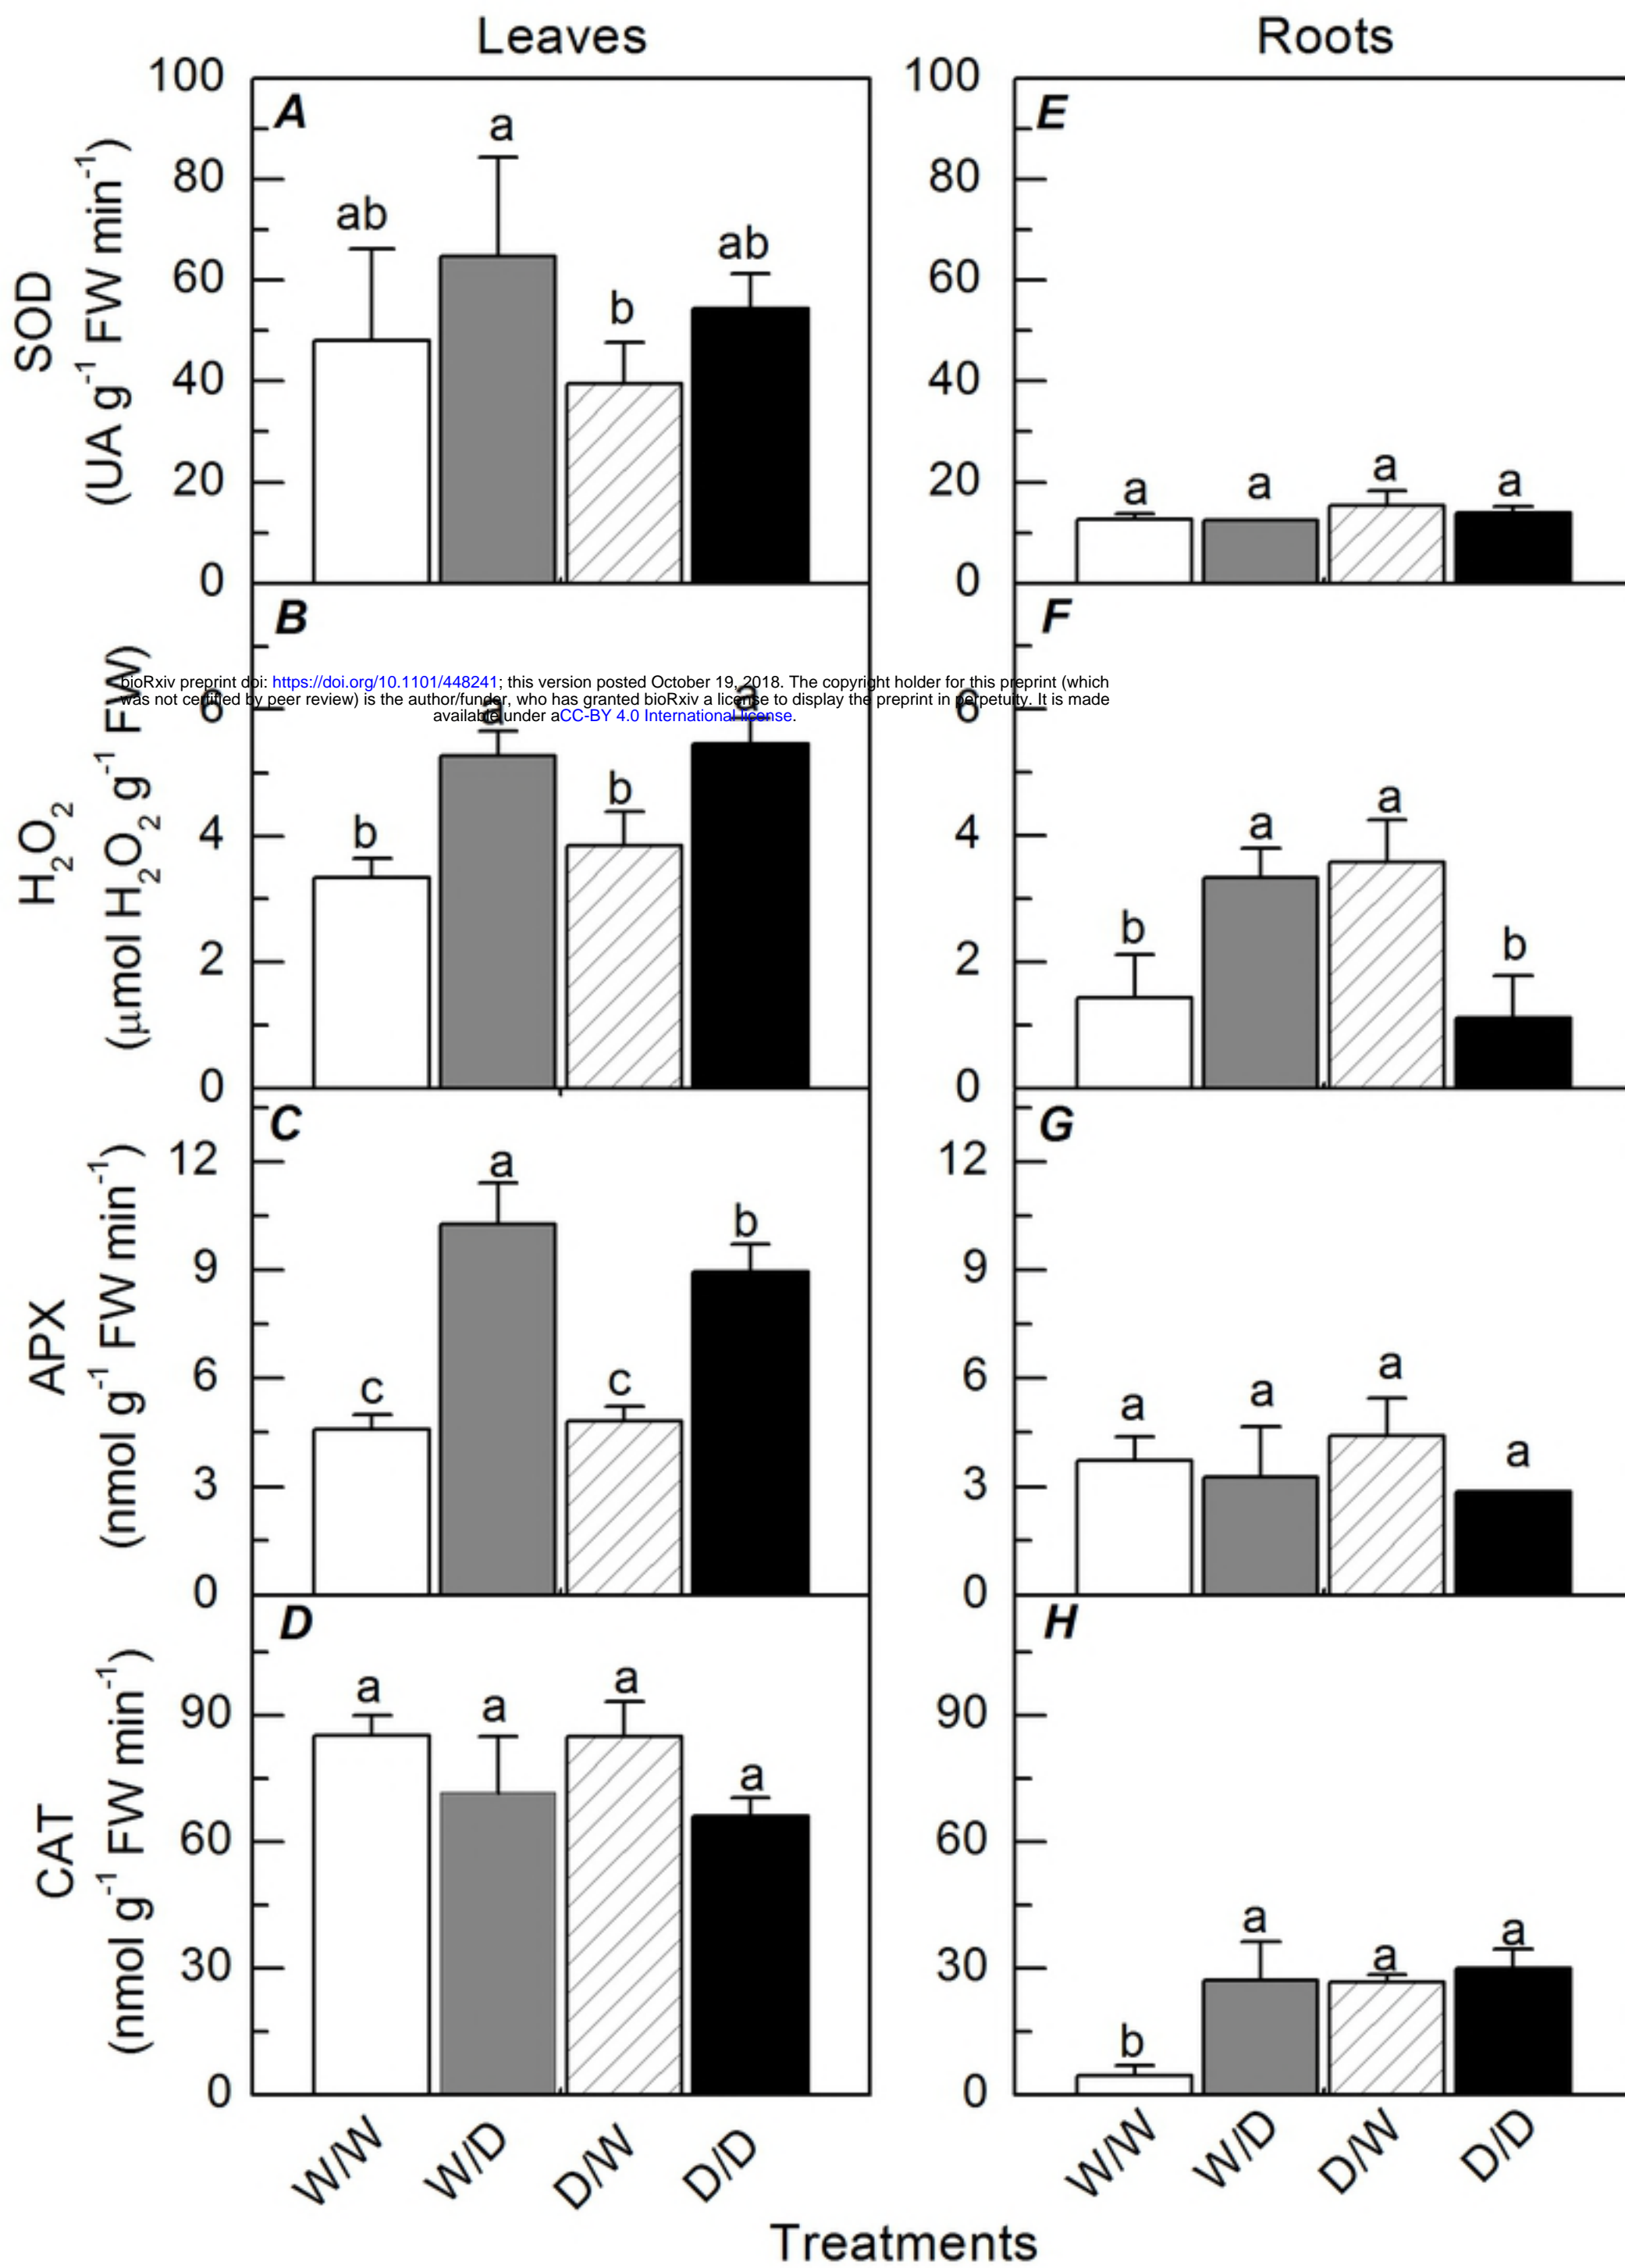

Figure 7



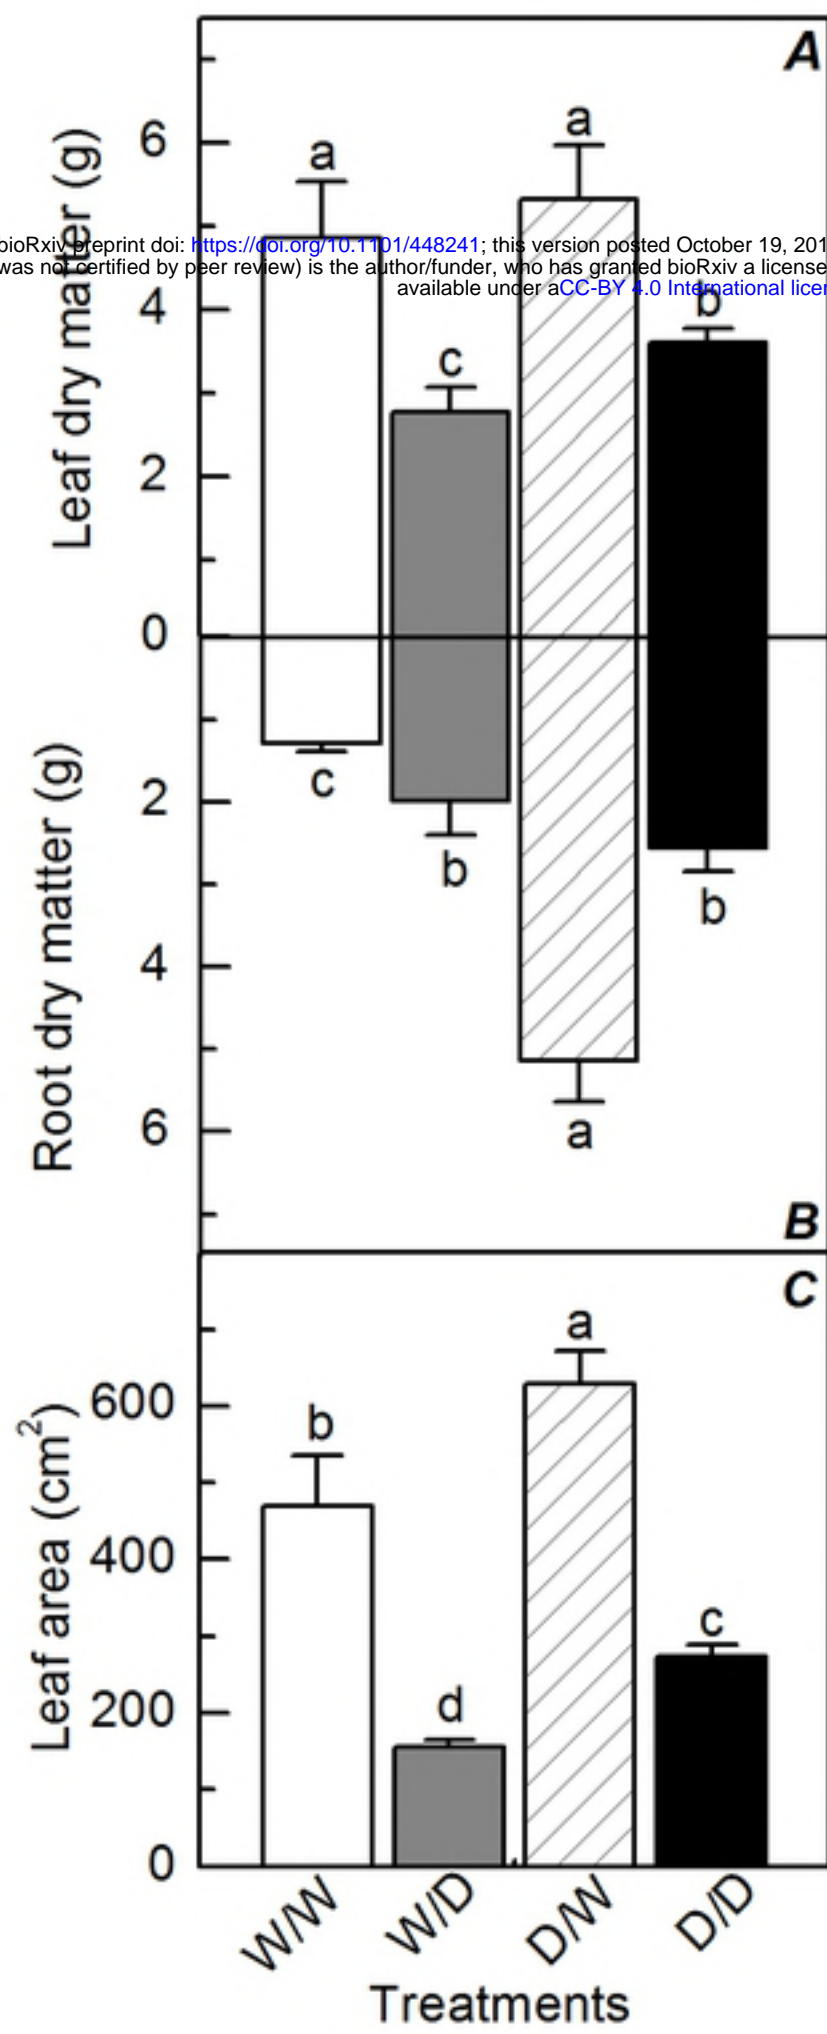

Figure 8
